# 1 **Brain deletion of Serf2 shifts amyloid conformation in a mouse model**

2 E. Stroo<sup>1#</sup>, L. Janssen<sup>1#\*</sup>, O. Sin<sup>1</sup>, W. Hogewerf<sup>1</sup>, M. Koster<sup>2</sup>, L. Harkema<sup>2</sup>, S.A. Youssef<sup>2,3</sup>, N.  
3 Beschorner<sup>4</sup>, A.H.G. Wolters<sup>5</sup>, B. Bakker<sup>1</sup>, A. Thathiah<sup>6,7</sup>, F. Fojjer<sup>1</sup>, B. van de Sluis<sup>2</sup>, J. van Deursen<sup>8</sup>,  
4 M. Jucker<sup>4</sup>, A. de Bruin<sup>2,3</sup>, E.A.A. Nollen<sup>1\*</sup>

5 <sup>1</sup>European Research Institute for the Biology of Ageing, University of Groningen, University Medical  
6 Centre Groningen, The Netherlands

7 <sup>2</sup>Department of Biomolecular Health Sciences, Faculty of Veterinary Medicine, Utrecht University,  
8 The Netherlands

9 <sup>3</sup>Department of Pediatrics, Molecular Genetics Section, University of Groningen, University Medical  
10 Centre Groningen, The Netherlands

11 <sup>4</sup>Department of Cellular Neurology, Hertie-Institute for Clinical Brain Research, University of  
12 Tübingen, Tübingen, Germany.

13 <sup>5</sup>Department of Biomedical Sciences of Cells and Systems, University Medical Centre Groningen, The  
14 Netherlands

15 <sup>6</sup>VIB Center for the Biology of Disease, KU Leuven Center for Human Genetics, University  
16 of Leuven, Leuven, Belgium

17 <sup>7</sup> Department of Neurobiology, University of Pittsburgh Brain Institute, University of  
18 Pittsburgh School of Medicine, Pittsburgh, PA USA

19 <sup>8</sup>Mayo Clinic, United States of America

20 <sup>#</sup>These authors contributed equally

21 <sup>\*</sup>Corresponding authors: [l.i.s.janssen@umcg.nl](mailto:l.i.s.janssen@umcg.nl) or [e.a.a.nollen@umcg.nl](mailto:e.a.a.nollen@umcg.nl)

22 Keywords: Small EDRK-rich factor 2, SERF, protein aggregation, amyloid-beta, amyloid  
23 polymorphisms

## 24 **Highlights**

- 25 • Loss of SERF2 slows embryonic development and causes perinatal lethality
- 26 • SERF2 affects proliferation in a cell-autonomous fashion
- 27 • Brain-specific *Serf2* knockout does not affect viability or A $\beta$  production
- 28 • Brain deletion of *Serf2* shifts the amyloid conformation of A $\beta$

29 **Abstract**

30 Loss of protein homeostasis accelerates ageing and contributes to age-related brain diseases like  
31 Parkinson's and Alzheimer's diseases. Disease-specific proteins become aggregation-prone and form  
32 amyloid deposits that characterize disease, but the biological mechanisms driving their transition in  
33 cells and tissues are poorly understood. MOAG-4/SERF accelerates aggregation and toxicity of  
34 disease-related proteins in worm- and cell models. Whether MOAG-4/SERF affects amyloid  
35 pathology in brain, however, has remained unknown. Here we show that brain-specific knockout of  
36 SERF2 is viable and shifts aggregation in a mouse model for amyloid-beta aggregation. Without  
37 affecting amyloid-beta levels, knockout of SERF2 redirects its assembly into structurally and  
38 morphologically distinct amyloid fibrils and deposits. Our results show that SERF modifies the  
39 structural outcome of the aggregation process in mammalian brain. With structural polymorphisms  
40 recently being associated with disease severity and progression, our results may help to understand the  
41 molecular basis for structural diversity and find possibilities for structure-based interventions.

## 42 Introduction

43 Protein aggregation is a pathological hallmark shared by several age-related neurodegenerative  
44 diseases, such as Alzheimer (AD), Parkinson and Huntington disease. The amyloid-like aggregates  
45 that accumulate in each of these diseases are composed of disease-specific proteins, i.e., amyloid-beta  
46 (A $\beta$ ) and tau in AD<sup>1-4</sup>, alpha-synuclein ( $\alpha$ -Syn) in Parkinson disease<sup>5</sup> and Huntingtin (HTT) in  
47 Huntington disease<sup>6</sup>. While the exact molecular mechanisms underlying the disease pathology remain  
48 to be elucidated, genetic evidence indicates that these aggregation-prone proteins play a key role in the  
49 disease processes. In AD multiple causative mutations have been found in three genes: the amyloid  
50 precursor protein (*APP*)<sup>7-15</sup>, presenilin-1 (*PSEN1*)<sup>16-20</sup> and presenilin-2 (*PSEN2*)<sup>20-23</sup> (for a full list of  
51 known AD-linked mutations see <https://www.alzforum.org/mutations>). The *APP* gene encodes the  
52 precursor protein from which A $\beta$  is produced through sequential cleavage by a  $\beta$ - and  $\gamma$ -secretase. The  
53 *PSEN* genes encode the main catalytic subunit of the  $\gamma$ -secretase complex. The fact that all the  
54 causative mutations affect the production, length and/or structure of the A $\beta$  peptides and are sufficient  
55 to cause the disease<sup>7,8,17-23,9-16</sup>, is arguably the strongest piece of evidence for the involvement of A $\beta$  in  
56 the disease process. Causative mutations generally affect the A $\beta$  peptide in one of three ways: (i) an  
57 overall increase in A $\beta$  production<sup>9,24</sup>, (ii) a shift in the production of shorter variants, like A $\beta$ <sub>40</sub>, to more  
58 aggregation-prone, longer variants, like A $\beta$ <sub>42</sub> (or A $\beta$ <sub>43</sub>)<sup>11,18,25-27</sup>, (iii) A $\beta$  peptides with a modified core  
59 region, resulting in an increased propensity for aggregation<sup>15,28-30</sup>. Taken together, these mutations  
60 do not necessarily increase the amount of A $\beta$ , but rather increase the likelihood of A $\beta$   
61 aggregation. Similarly, several mutations in the *SNCA* gene that have been linked to Parkinson  
62 disease have been shown to alter  $\alpha$ -Syn aggregation<sup>31-36</sup>. In Huntington disease, any expansion of a  
63 polyglutamine stretch in the *HTT* gene that exceeds 36 repeats has been shown to facilitate HTT  
64 aggregation and cause the disease<sup>37</sup>. Hence, changes in the folding and aggregation of these disease  
65 proteins are believed to be at the basis of the observed pathology. In addition, there is increasing  
66 evidence that distinct structural variants exist between aggregates of the same disease protein and that  
67 these polymorphs are associated with varying degrees of toxicity<sup>38-47</sup>. For instance, recent studies with  
68 brain samples from human AD patients have shown that variations in the disease type and disease

69 progression correlate with the presence of structurally different aggregates and fibrils<sup>40,41,48,49</sup>. The  
70 knowledge that small changes in the structural conformation of these aggregates can have far-reaching  
71 effects on the disease manifestation could provide a new avenue for the development of therapeutics.  
72 Until now, most research into potential treatments of AD has focused on either reducing the overall  
73 amount of aggregating proteins or preventing aggregation, not modifying the aggregation process.

74 In a previous study, our group performed a genetic screen in *Caenorhabditis elegans* (*C. elegans*) and  
75 identified a small, intrinsically disordered protein of unknown function with the capacity to modify  
76 protein aggregation and to enhance the resulting toxicity of multiple disease-related, aggregation-  
77 prone proteins<sup>50</sup>. This peptide was dubbed *modifier of aggregation-4* (MOAG-4) and was found to be  
78 an ortholog of two human genes: *Serf1A* and *Serf2*. Both SERF1A and SERF2 were shown to  
79 exacerbate protein aggregation and toxicity in human neuroblastoma and HEK293 cell lines as well<sup>50</sup>.  
80 *In vitro* assays with MOAG-4 and SERF1A have demonstrated that these proteins can specifically  
81 accelerate the aggregation kinetics of amyloidogenic proteins, but do not affect aggregation of non-  
82 amyloidogenic proteins<sup>51,52</sup>. For  $\alpha$ -Syn, this amyloid-promoting effect has been shown to depend on  
83 the transient interaction of these positively-charged peptides with negatively-charged regions and the  
84 disruption intramolecular electrostatic interactions within the protein<sup>51-53</sup>. Removal of MOAG-4 or  
85 SERF from a biological system did not change the overall levels of the aggregation-prone proteins or  
86 activate chaperone pathways known to suppress aggregation<sup>50</sup>. Therefore, the reduced toxicity would  
87 appear to rely solely on the structural shift in the aggregation process<sup>50,51</sup>. In this study, we investigate  
88 whether the removal of SERF2 modifies the aggregation of A $\beta$  in the biologically more complex  
89 environment of the mammalian brain.

## 90 Results

### 91 *Full-body Serf2 KO results in developmental delay and perinatal lethality in mice*

92 To establish the role of SERF2 *in vivo*, full-body *Serf2* knockout (KO) mice were generated (Figure  
93 S1A-C). During an initial cross, using the four homozygous *Serf2* KO animal (*Serf2*<sup>-/-</sup>) and eight  
94 heterozygous *Serf2* KO animals (*Serf2*<sup>+/-</sup>) we obtained, only one *Serf2*<sup>-/-</sup> survived the day of birth  
95 compared to 27 *Serf2*<sup>+/-</sup> and 96 *Serf2* wild-type (*Serf2*<sup>+/+</sup>) mice (Supplemental Table 1). After  
96 backcrossing into C57BL/6J background, interbreeding of *Serf2*<sup>+/-</sup> animals did not result in any viable  
97 *Serf2*<sup>-/-</sup> mice at the time of weaning (Figure 1A,1B). To determine whether *Serf2*<sup>-/-</sup> mice died during  
98 fetal development, we examined the offspring at multiple developmental stages: embryonic day 13.5,  
99 15.5 and 17.5. In all of the examined embryonic stages we observed the expected Mendelian ratio of  
100 genotypes, around 25 % *Serf2*<sup>+/+</sup> and *Serf2*<sup>-/-</sup> embryos and around 50 % *Serf2*<sup>+/-</sup> (Chi Square: E13.5  
101 p=0.9672; E15.5 p= 0.4432; E17.5 p=0.7674) (Figure 1B). At birth (P0), all *Serf2*<sup>-/-</sup> displayed  
102 respiratory distress and the majority (5/7) died within 30 minutes of being born. At the time of  
103 weaning, the Mendelian ratio was maintained between the *Serf2*<sup>+/+</sup> and *Serf2*<sup>+/-</sup> animals, but no *Serf2*<sup>-/-</sup>  
104 mice survived until this stage (Chi Square: P22 p<0.0001) . Examination of *Serf2* mRNA expression at  
105 E13.5 showed a 50 % reduction for *Serf2*<sup>+/-</sup> and complete KO for *Serf2*<sup>-/-</sup> compared to *Serf2*<sup>+/+</sup> (One-  
106 way ANOVA: *Serf2*<sup>+/-</sup> and *Serf2*<sup>-/-</sup> vs *Serf2*<sup>+/+</sup> p<sub>Bon</sub><0.0001) (Figure 1C). A similar ratio in SERF2  
107 expression was also observed on the protein level (Figure 1D). The *Serf1* mRNA levels were not  
108 affected by the change in *Serf2* levels, indicating there is no compensatory mechanism between these  
109 genes (One-way ANOVA: p=0.2403) (Figure 1C). Further analysis of the *Serf2*<sup>-/-</sup> embryonic  
110 phenotype revealed a reduction in embryo size of *Serf2*<sup>-/-</sup> compared to *Serf2*<sup>+/+</sup> and *Serf2*<sup>+/-</sup> from E15.5  
111 until birth (Two-way ANOVA: E17.5 WT vs KO p<sub>bon</sub><0.05; P0 WT vs ko p<sub>Bon</sub><0.0001) (Figure 1E,  
112 S1D-E). No differences in size could be observed between *Serf2*<sup>+/+</sup> and *Serf2*<sup>+/-</sup> embryos during the  
113 embryonic stage leading up to birth (P0). Histological examination of various tissues revealed a  
114 developmental delay of approximately one to two days in the organs of E17.5 *Serf2*<sup>-/-</sup> embryos  
115 compared to the previous time points and standard embryonic development<sup>54,55</sup>. This was most  
116 prominently in the lungs, through reduced expansion of alveoli and augmented tissue density, and in

117 the kidneys, by the increased amount of mesenchyme between the tubules and glomeruli (Figure S1F).  
118 At the time of birth, the lungs of *Serf2*<sup>-/-</sup> pups displayed a significantly reduced saccular space (t-test:  
119 p= 0.0088) (Figure 1F), reflecting insufficient lung expansion and maturation. This partial fetal  
120 atelectasis seems to explain the observed respiratory distress and a likely cause of the perinatal  
121 lethality in *Serf2*<sup>-/-</sup> pups. Placental abnormalities have been shown to cause impaired transfer of  
122 nutrients and oxygen to the embryo, resulting in growth delays<sup>56</sup>. To exclude this as a potential cause,  
123 we examined the placenta at all three embryonic stages for microscopic lesions in the placental  
124 labyrinth or other changes. No genotype-related pathology could be found, indicating that absence of  
125 SERF2 in the embryo itself is responsible for the observed growth phenotype. This seems to be  
126 supported by the fact that CRISPR-induced *Serf2*<sup>-/-</sup> clones of HEK293T cells display a delay in  
127 proliferation (Figure S2A). Moreover, RNA sequencing analysis of mouse embryonic fibroblasts  
128 (MEF) isolated from E13.5 embryos showed a clear enrichment of GO-terms clustered around three  
129 closely related biological functions: cell cycle, cell proliferation and cell adhesion (Supplemental  
130 Figure S2A-B). Interestingly, in the cell cycle cluster we observe an overall upregulation of factors  
131 driving cell division and downregulation of growth arrest factors in *Serf2*<sup>-/-</sup> MEFs (Supplemental Table  
132 2). This observation seems in line with a developmental delay phenotype in *Serf2*<sup>-/-</sup> mice, because it is  
133 known that cell proliferation is favored over differentiation in earlier stages of embryonic development  
134 compared to later stages<sup>57</sup>. Overall, the cell culture results point towards a cell-autonomous effect of  
135 SERF2 and suggest that loss of *Serf2* results in delayed growth. While our previous study also  
136 demonstrated a cell-autonomous function for moag-4, it did not show any effects of moag-4 deletion  
137 on the viability, life span or size of *C. elegans*<sup>50</sup>. All together, our results suggest that *Serf2* KO causes  
138 delayed maturation of certain organs at the time of birth resulting in death. Given the cell-autonomous  
139 nature of the effects of SERF2, we aimed to avoid these adverse effects by creating an organ-specific  
140 conditional KO model.

#### 141 *Brain-specific KO of Serf2 does not affect viability or the A $\beta$ production pathway*

142 To study the effect of *Serf2* KO on amyloid pathology in the brain, we circumvented the perinatal  
143 lethality of full-body *Serf2* KO mice by generating a brain-specific *Serf2* KO mouse model (*Serf2*<sup>br/-</sup>).

144 The conditional KO was obtained by combining our *Serf2*<sup>flox/flox</sup> mice with a *Sox1-Cre* model<sup>58</sup> (Figure  
145 S3A). SOX1 is one of the earliest transcription factors expressed in neuronal precursors of the  
146 ectoderm from embryonic day 7.5<sup>59,60</sup>. Consequently, the *Sox1* promoter was selected as a pan-  
147 neuronal driver of Recombinase cre expression to restrict homologous recombination to the central  
148 nervous system<sup>58</sup>. Analysis of *Serf2* expression on the mRNA and protein level in various organs  
149 confirmed brain-specific ablation of *Serf2* by *Sox1*-mediated *Cre* expression in our *Serf2*<sup>flox/flox</sup> mice (t-  
150 test WT vs *Serf2*<sup>br/-</sup> brain: 1m p=0.0022; 3m p=0.00527) (Figure S3B-C). This conditional KO was  
151 crossed with the *APP/PS1-21* amyloid (AM) model<sup>61</sup>, which contains human transgenes for both APP  
152 with the Swedish KM670/671NL mutation and PSEN1 with the L66P mutation. From this cross we  
153 obtained four experimental groups: WT, *Serf2*<sup>br/-</sup>, AM and AM;*Serf2*<sup>br/-</sup> (Figure 2A). Upon crossing  
154 of the *Serf2*<sup>br/-</sup> with the amyloid model, we observed the expected Mendelian ratio for all the  
155 genotypes at P22, indicating that the viability is not significantly affected by brain-specific KO of  
156 *Serf2* (Chi Square: p= 0.37)( Supplemental Table 3). Based on the known progression of A $\beta$  plaque  
157 pathology in the AM mice, we selected two age groups for further analysis: before (1 month) and after  
158 (3 months) A $\beta$  plaque deposition (Figure 2B). Analysis of the *Serf2* mRNA levels in both age groups  
159 showed that *Serf2* expression was not altered by the plaque pathology and confirmed the KO in the  
160 *Serf2*<sup>br/-</sup> and AM;*Serf2*<sup>br/-</sup> mice. Some residual *Serf2* expression could be detected in the brains of the  
161 KO groups likely due to the presence of cells from non-neuronal lineage in the samples, e.g. cells from  
162 circulatory system (Two-way ANOVA: *Serf2*<sup>br/-</sup> and AM;*Serf2*<sup>br/-</sup> vs WT 1m p<sub>bon</sub> <0.001; 3m p<sub>bon</sub>  
163 <0.0001) (Figure 2C). These results were also confirmed on the protein level using western blot  
164 (Figure 2D). In accordance with the effects observed in the full-body *Serf2*<sup>-/-</sup> mice, the *Serf2*<sup>br/-</sup> and the  
165 AM;*Serf2*<sup>br/-</sup> mice did show a reduction in brain weight compared to WT in both age groups (Two-  
166 way ANOVA: *Serf2*<sup>br/-</sup> vs WT both ages p<sub>bon</sub><0.01; AM;*Serf2*<sup>br/-</sup> vs WT 1m p<sub>bon</sub><0.0001; 3m  
167 p<sub>bon</sub><0.001) (Figure 2E). While the weight reduction seems to be slightly more pronounced in  
168 AM;*Serf2*<sup>br/-</sup> compared to *Serf2*<sup>br/-</sup>, AM by itself displayed no significant change in brain weight. This  
169 would indicate that *Serf2* ablation, *Cre* expression or a combination of both is most likely responsible  
170 for the difference in weight. However, AM mice may be more susceptible to this effect (Figure 2E).  
171 To distinguish between the effects of *Cre* expression and *Serf2* KO, we also examined the *Sox1-Cre*



172 mice<sup>58</sup> without floxed *Serf2* (*Cre*<sup>br</sup>) and crossed them with *APPPS1-2I*<sup>61</sup> without floxed *Serf2*. The  
173 *Cre*<sup>br</sup> mice also showed a reduction in brain weight compared to the WT controls, which was more  
174 pronounced at 1 month (One-Way ANOVA: *Cre*<sup>br</sup> vs WT 1m p<sub>bon</sub><0.05) (Figure S3D), but was overall  
175 less extensive than the reduction in *Serf2*<sup>br/-</sup> animals (One-way ANOVA: *Cre*<sup>br</sup> vs WT p<sub>bon</sub><0.01;  
176 AM;*Cre*<sup>br</sup> vs WT p<sub>bon</sub><0.001) (Figure 2F). Together, this suggests that *Cre* expression is partially  
177 responsible for the observed decrease in brain size, particularly at 1 month of age. Due to ongoing  
178 brain maturation between 1 and 3 months, all groups show a significant increase in brain weight (Two-  
179 way Anova: Age p<0.0001), but this maturation appeared unaffected by *Serf2* KO. Moreover, the  
180 difference in brain weight between WT and *Serf2*<sup>br/-</sup> remained constant beyond the age of 3 months up  
181 to 11 months of age (Figure S3E). This suggests that the reduction in brain size takes place during  
182 specific stages of brain development, but that the continued development is not necessarily altered by  
183 these changes. Additional histological examination of the brains with hematoxylin-eosin staining  
184 revealed no difference in the cell density (Figure 2G), nor did we find any evidence of degeneration,  
185 apoptosis or necrosis. Apart from the overall reduction in weight, the brains showed no structural  
186 abnormalities and the tissue appeared healthy.

187 Next, we examined whether the brain KO of *Serf2* affected any of the key components in the A $\beta$   
188 aggregation process, like altering the levels of APP or the production of its cleavage products, A $\beta$ <sub>40</sub>  
189 and A $\beta$ <sub>42</sub>. We determined the expression of human *APP* in WT, *Serf2*<sup>br/-</sup>, AM and AM;*Serf2*<sup>br/-</sup> mice  
190 at both 1 and 3 months of age and observed no difference due to brain specific *Serf2* KO (t-test: 1m  
191 p=0.9170; 3m p=0.9963) (Figure 2H, data from WT, *Serf2*<sup>br/-</sup> not included due to lack of APP  
192 construct and absence of signal). Western blot analysis confirmed there was also no difference in APP  
193 protein levels between AM and AM;*Serf2*<sup>br/-</sup> (t-test: 1m p= 0.1157;3m p=0.5908) (Figure 2I and J).  
194 Further analysis of A $\beta$ <sub>40</sub> (Two-way ANOVA: Genotype p=0.8841; Age p<0.0001 ;Interaction  
195 p=0.8841) (Figure 2K) and A $\beta$ <sub>42</sub> (Two-way ANOVA: Genotype p=0.7006; Age p<0.0001 ;Interaction  
196 p=0.6522) (Figure 2L) showed an increase in concentration between 1 and 3 months, but this was the  
197 same in both AM and AM;*Serf2*<sup>br/-</sup>. Given the variability in the A $\beta$  concentrations at 3 months and the  
198 fact that the ratio between these two peptides is known to affect the aggregation process, we also

199 investigated the correlation between these two A $\beta$  levels (Figure 2M). This analysis showed that mice  
200 with a high A $\beta_{42}$  concentration display a similarly high A $\beta_{40}$  level, maintaining a comparable A $\beta_{40}$   
201 /A $\beta_{42}$  ratio for both AM and AM;*Serf2*<sup>br/-</sup> animals. Taken together, this data suggests that SERF2 does  
202 not affect the levels of APP and its cleavage products, A $\beta_{40}$  and A $\beta_{42}$ . These findings are in accordance  
203 with the previously observed effects of MOAG-4 on the aggregation of polyglutamine, A $\beta$  and  $\alpha$ Syn  
204 in *C. elegans*, which modifies the aggregation process without changing the overall levels of these  
205 aggregation-prone proteins<sup>50</sup>. While the difference in brain size is definitely a factor to be considered  
206 during further analysis, given the fact that we observed no obvious changes in the overall health,  
207 continued development and APP processing pathway of these brain-specific *Serf2* KO mice, we  
208 proceeded with our analysis of A $\beta$  pathology in these animals.

### 209 *Serf2* KO alters the amount of A $\beta$ deposition in the brain

210 We next investigated whether SERF2 affects the A $\beta$  aggregation by performing immunohistological  
211 analysis of the A $\beta$  plaque pathology. Initially, we performed a general A $\beta$  staining using the 6E10  
212 antibody. In accordance with the known progression of A $\beta$  plaque pathology in the amyloid model, we  
213 only found extracellular deposits in the 3-month-old AM and AM;*Serf2*<sup>br/-</sup> mice. As expected, most  
214 plaques were found in the cortex, with some pathology beginning to spread to the hippocampus as  
215 well (Figure S4). Microscopic inspection of the A $\beta$  deposits revealed a broad range of sizes with a  
216 wide variety in staining intensity and patterns, but we found no clear morphological differences  
217 between the plaque population found in AM and AM;*Serf2*<sup>br/-</sup> (Figure 3A, S4). Quantification of the  
218 6E10-positive deposits showed a slight increase in AM;*Serf2*<sup>br/-</sup> compared to AM, but this just failed  
219 to reach statistical significance in the Bonferroni corrected post-hoc comparison (Two-way ANOVA:  
220 all 3m non-AM vs AM groups  $p_{\text{bon}} < 0.0001$ ; AM vs AM;*Serf2*<sup>br/-</sup>  $p_{\text{bon}} = 0.063$ ) (Figure 3B). Given the  
221 high variability in plaque load between animals within the same experimental group, we examined  
222 whether this variability reflected the previously observed variation in A $\beta$  levels. Unsurprisingly,  
223 animals with higher levels of A $\beta_{40}$  (Figure 3C) and A $\beta_{42}$  (Figure 3D) displayed a higher overall plaque  
224 load in both groups. More interestingly, our linear regression analysis revealed that AM;*Serf2*<sup>br/-</sup> mice  
225 tend to have a significantly higher plaque load than AM mice with similar A $\beta$  levels (Supplemental

226 Table 4). A second general A $\beta$  stain with the W0-2 antibody displayed a similar slight increase in the  
227 amount of plaque deposits in AM;*Serf2*<sup>br/-</sup> at 3 months (Two-way ANOVA: all 3m non-AM vs AM  
228 groups  $p_{\text{bon}} < 0.0001$ ; AM vs AM;*Serf2*<sup>br/-</sup>  $p_{\text{bon}} = 0.101$ ) (Figure 3E). In fact, a comparison between the  
229 6E10 and the W0-2 staining in individual animals confirmed the similarity between both staining  
230 patterns at 3 months (Figure 3F, S5, Supplemental Table S3). Interestingly, our detection algorithm  
231 also picked up a small increase in the counts of W0-2-positive foci in the 1 month AM;*Serf2*<sup>br/-</sup> group  
232 (Two-way ANOVA: 1m WT vs AM;*Serf2*<sup>br/-</sup>  $p_{\text{bon}} = 0.088$  ; *Serf2*<sup>br/-</sup> vs AM;*Serf2*<sup>br/-</sup>  $p_{\text{bon}} = 0.081$ ; AM  
233 vs AM;*Serf2*<sup>br/-</sup>  $p_{\text{bon}} = 0.127$ ; all other comparisons  $p_{\text{bon}} > 0.999$ ) (Figure 3E). Closer examination of the  
234 microscopic images revealed the identified spots were not extracellular plaques, but were the result of  
235 increased levels of W0-2-positive intracellular staining in AM;*Serf2*<sup>br/-</sup> (Figure S7A). Some low level  
236 intracellular W0-2 and 6E10 staining could also be observed in the other 1-month-old AM mice, but  
237 not to the extent that it was picked up by the detection algorithm (Figure S7A-B). This would suggest  
238 that the deletion of *Serf2* already alters the intracellular accumulation of A $\beta$  prior to plaque deposition.  
239 Overall, these results indicate that the presence of SERF2 is indeed able to modify A $\beta$  aggregation in  
240 the mouse brain.

241 *SERF2 deficiency changes the proportion of ThS-positive cores, but not the immunoreactivity*  
242 *of deposits*

243 To investigate if SERF2 also affected the amount of Thioflavin-positive fibrils, we performed  
244 Thioflavin-S (ThS) staining. Here, we again observed a large variety in the amount of ThS-positive  
245 plaques between individual animals, but we found no mean difference between AM and AM;*Serf2*<sup>br/-</sup>  
246 mice (Two-way ANOVA: all 3m non-AM vs AM groups  $p_{\text{bon}} < 0.001$ ) (Figure 3G). However, further  
247 analysis of the correlation between A $\beta$  levels and the amount of ThS-positive plaques revealed that  
248 AM mice showed a positive correlation similar to the general A $\beta$  stainings, while AM;*Serf2*<sup>br/-</sup> mice  
249 displayed an inverse relationship (Figure 3H, 3I, Supplemental Table S3). Consequently, a general  
250 increase in A $\beta$  deposits does not equate to an increase in amyloid deposition in AM;*Serf2*<sup>br/-</sup> mice, as  
251 it does in AM mice (Figure 3J), further demonstrating a change in the amyloid formation in *Serf2* KO  
252 mice. In addition, we investigated microglia activation and whether we could detect a change in the

253 gliosis associated with A $\beta$  plaques. Staining for Iba1 showed a slight increase in the AM;*Serf2*<sup>br/-</sup> mice  
254 compared to AM (Two-way ANOVA: 3m non-AM groups vs AM p<sub>bon</sub> <0.01; non-AM groups vs  
255 AM;*Serf2*<sup>br/-</sup> p<sub>bon</sub> <0.0001; AM vs AM;*Serf2*<sup>br/-</sup> p<sub>bon</sub> <0.01) (Figure 3K), similar to what was observed  
256 with the 6E10 staining (Figure 3B). We therefore examined if this increase was simply related to the  
257 increase in A $\beta$  deposits or if AM;*Serf2*<sup>br/-</sup> also displayed a different immune response to plaques  
258 compared to AM. Our analysis revealed a similar correlation between 6E10-positive deposits and  
259 immune response for AM and AM;*Serf2*<sup>br/-</sup> mice, suggesting the deposits evoked a similar immune  
260 response in both groups (Figure S6A, Supplemental Table S3).

### 261 *Knockout of Serf2 changes the plaque composition and fibril structure*

262 Given the differences in the reactivity of the A $\beta$  deposits between the various stains, we decided to  
263 explore the composition within the individual plaques in greater detail. To this end, we made use of  
264 two luminescent conjugated oligothiophenes (LCO), qFTAA (quadro-formylthiophene acetic acid)  
265 and hFTAA (hepta-formylthiophene acetic acid). These LCOs are small hydrophobic ligands with a  
266 high affinity for binding distinct types of amyloids and can easily be distinguished from each other  
267 based on their spectral properties<sup>62</sup>. The smallest of the two molecules, qFTAA, is characterized by a  
268 peak in its emission spectrum around 500 nm and has been shown to stain compact, multifilament  
269 fibril structures, coinciding with ThT and Congo red staining<sup>62-64</sup>. Whereas hFTAA emits in the  
270 yellow to red range with a peak around 600 nm and is capable of staining prefibrillar (non-  
271 thioflavinophilic) and single fibril aggregates found during the lag-phase of in vitro ThT kinetics  
272 (Figure 4A). The prefibrillar aggregates were shown to be stained with 6E10, but not Congo red, ThT  
273 or qFTAA<sup>62-64</sup>. Previous studies have shown that by combining LCO dyes it is possible to uncover  
274 structural differences in plaque composition<sup>49,64,65</sup>. We performed confocal spectral imaging of  
275 randomly selected plaques in 3-month-old AM and AM;*Serf2*<sup>br/-</sup> mice after double staining with both  
276 LCOs and determined the ratio of the light intensity emitted at 502nm and 588nm as a measure for the  
277 relative amounts of fibrillar and prefibrillar aggregates within the individual plaques. An exploratory  
278 frequency analysis of the intensity ratios found in both groups revealed a three-peak pattern in which  
279 the middle peak was similarly represented in both groups (Figure 4B, green area). The first peak,

280 however, was predominantly found in AM mice (Figure 4B, red area), while the third peak was mainly  
281 detected in AM;*Serf2*<sup>br/-</sup> (Figure 4B, blue area). This shift in ratio was also reflected by a significant  
282 difference in the average intensity ratio between AM and AM;*Serf2*<sup>br/-</sup> (t-test p<0.001) (Figure 4C).  
283 This increase in intensity ratio could not be observed in AM;*Cre*<sup>br</sup> mice (t-test p=0.6047) (Figure 4C,  
284 insert), indicating that this effect is caused by the *Serf2* KO and unrelated to *Cre* expression. Given the  
285 fact that AM;*Cre*<sup>br</sup> animals also show a decrease in brain weight without a change in LCO staining,  
286 this would also suggest that the weight reduction is not a factor in these results. Although, as the  
287 change in brain weight is more pronounced in *Serf2*<sup>br/-</sup> animals, we cannot completely exclude this as  
288 a potential contributing factor. Next, we examined if the change in the intensity ratio correlated with  
289 the slight increase in 6E10-positive deposits we observed in AM;*Serf2*<sup>br/-</sup> (Figure 4D). However, the  
290 higher average intensity ratio in AM;*Serf2*<sup>br/-</sup> mice was not related to this general plaque load nor the  
291 number of W0-2- or ThS-positive deposits (Figure S6B, S6C). Further microscopic analysis of low  
292 intensity ratio deposits from AM mice showed a plaque with a qFTAA- and hFTAA-positive core and  
293 a border that was only stained by hFTAA (Figure 4E, left panels). The high intensity ratio deposits  
294 from AM;*Serf2*<sup>br/-</sup> mice, on the other hand, revealed a qFTAA-positive core, but virtually no hFTAA-  
295 staining (Figure 4E, right panels), demonstrating the difference in plaque composition reflected by the  
296 shift in LCO intensity ratios. Additionally, we visualized the global fibrillar structure of the plaques on  
297 a nanometer scale using high resolution, scanning transmission electron microscopy (STEM). Overall,  
298 STEM images of plaques from AM;*Serf2*<sup>br/-</sup> tended to show more condensed plaques composed of  
299 short, thick and densely packed bundles of fibers with little space in between (Figure 4F, right panels).  
300 In the AM mice, however, the plaques we observed displayed more loosely packed fibrils (Figure 4F,  
301 left panels). Taken together, these findings suggest *Serf2* KO in mice leads to a shift in the A $\beta$   
302 aggregation process, resulting in an altered structural composition of the plaques.

## 303 Discussion

304 Previous studies identified MOAG-4 and its human orthologs SERF1A and SERF2 and their potential  
305 to modify the aggregation of amyloidogenic proteins. While the exact endogenous biological function  
306 of these peptides remains unclear, a recent study has provided evidence for RNA-binding properties of

307 SERF1A through a region which is highly conserved in MOAG-4 and SERF2<sup>66</sup>. In this study, we have  
308 demonstrated in cells and mice that SERF2 provides a growth advantage during development. The  
309 absence of SERF2 or MOAG-4 in itself does not appear to be lethal in cells, worms or the brain-  
310 specific KO mice. Therefore, we postulate that the observed perinatal lethality in the full-body KO  
311 mice is a secondary effect of the delay in growth due to insufficient maturation of certain organs at  
312 birth. This appears to be supported by the fact that some pups survived the initial minutes after birth  
313 and incomplete penetrance of the lethality in the earliest generations with mixed genetic background.  
314 The 129SV genetic background present in these mice is known to have a gestation period that is on  
315 average around one day longer than C57/B16J mice<sup>67</sup>, which could result in improved lung maturation.  
316 While the exact function of SERF2 remains unknown, we propose its effects on growth and  
317 development are most likely caused through one of two mechanisms: either SERF2 facilitates cell  
318 proliferation or it protects cells from stressors that create an unfavorable environment for cell division.  
319 In the latter case, we would expect to see an upregulation of stress pathways or cell cycle arrest  
320 proteins inhibiting the cell cycle in *Serf2*<sup>-/-</sup> cells. Interestingly, the RNA seq analysis of the MEFs from  
321 our *Serf2*<sup>-/-</sup> mice showed the exact opposite. Cell cycle driving factors were upregulated (e.g. cyclins).  
322 Whereas, stress signaling and cell cycle inhibiting factors were downregulated (e.g. GADD45 and  
323 GAS1). Thus, the *Serf2*<sup>-/-</sup> cells actually displayed an increased stimulation of cell proliferation  
324 mechanisms, which would fit with cells from earlier stages of embryonic development. This would  
325 suggest the first mechanism, with a beneficial role for SERF2 in the efficient execution of cell  
326 proliferation, as the most likely explanation for the observed growth effect. Furthermore, an increase  
327 in cellular stress would most likely result in decreased health and fitness. However, *moag-4* deletion  
328 worms showed no changes in life span compared to controls<sup>50</sup> and, apart from the initial growth  
329 deficit, the tissues of *Serf2* KO mice appeared healthy and continued to develop similarly to controls  
330 after birth. A recent study showed SERF1a might play a role as an RNA-organizing protein, which  
331 localizes to membraneless nuclear organelles, like the nucleolus, under normal physiological  
332 conditions. However, under stress conditions, it was shown to migrate to the cytoplasm, where it could  
333 drive amyloid toxicity.<sup>66</sup> While there was no compensatory upregulation of SERF1 in response to  
334 SERF2 KO and a similar mode of action remains to be demonstrated for SERF2, the structural

335 homology of the two proteins would suggest a comparable function. Given the importance of  
336 nucleolar disassembly and reassembly in cell cycle control<sup>68,69</sup>, an RNA-organizing function could  
337 explain how SERF2 facilitates cell proliferation. This developmental role would have limited  
338 biological importance in non-proliferating, differentiated cells, like the brain's neurons or the cells of  
339 adult *C. elegans*, and might also explain why we saw no adverse effects in the *moag-4* deletion worms  
340 or our adult *Serf2*<sup>br/-</sup> mice. While a reduced biological importance of SERF2 later in life could prove  
341 interesting with regard to the treatment of age-related neurodegenerative disorders, further exploration  
342 of SERF2's endogenous function and how it evolves with ageing will be needed to fully assess this  
343 mechanism's therapeutic potential.

344 In this study, we confirmed the ability of SERF2 to modify the A $\beta$  pathology *in vivo* in a mouse model  
345 without changing the overall A $\beta$  levels. We showed that mice lacking SERF2 were more prone to  
346 form A $\beta$  deposits and that the composition of these deposits was structurally different. In AM mice  
347 higher levels of A $\beta$  result in an increase in the numbers of A $\beta$  deposits as well as an increase in the  
348 number of ThS-positive deposits. AM;*Serf2*<sup>br/-</sup> mice, on the other hand, also show an increase in A $\beta$   
349 deposits, but this did not lead to higher numbers of ThS-positive plaques, indicating an altered  
350 dynamic for amyloid formation. These findings were further corroborated by the LCO spectra, which  
351 revealed that the plaques in AM;*Serf2*<sup>br/-</sup> mice have a different conformation of pre-fibrillar and  
352 fibrillar A $\beta$  compared to AM mice. Finally, STEM imaging also confirmed a globally altered structure  
353 of the amyloid fibrils in the plaques. Amyloid fibrils are formed through a nucleated self-assembly  
354 process characterized by a structural conformation to a  $\beta$ -strand secondary structure and the formation  
355 of a critical nucleus during the initial oligomerization. The nuclei act as seeds from which the fibrils  
356 grow and have been shown to propagate a specific fibril structure<sup>41,70</sup>. *In vitro* kinetic assays with  
357 SERF and MOAG-4 have shown that these peptides accelerate aggregation by acting on the nucleation  
358 phase<sup>51-53,71</sup>. Recently, we have shown that SERF2 is equally capable to drive amyloid formation of  $\alpha$ -  
359 Syn and A $\beta$  *in vitro* through a conserved, positively charged region<sup>72</sup>. Meanwhile, another study has  
360 demonstrated that binding of the intrinsically disordered protein yeast SERF to  $\alpha$ -Syn and A $\beta$  results  
361 in fuzzy complexes with heterogeneous structural conformations that are more extended in

362 nature<sup>71</sup>. For  $\alpha$ -Syn, the disruption of intra-molecular electrostatic interactions by the positively  
363 charged region of MOAG-4/SERF1 was found to expose an amyloid nucleation site<sup>52,53</sup>. Intra-  
364 molecular electrostatic interactions have also been proven to play a part in the dynamics and structure  
365 of the A $\beta$  monomer folding, which is at the basis of nucleus formation. In fact, several of the familial  
366 AD mutations located within the A $\beta$  sequence and reported not to affect the A $\beta$  levels, appear to exert  
367 their effects by modifying the intra-molecular interactions and monomer folding<sup>30,73–75</sup>. These single  
368 amino acid modifications in the A $\beta$  sequences also result in alterations in the aggregation kinetics,  
369 fibril structure and aggregate toxicity in *in vitro* studies<sup>29,76,77</sup>. Moreover, patients and mouse models  
370 with these mutations show differences in the localization of A $\beta$  accumulation and deposition, as well  
371 as differences in its structure, giving rise to specific disease phenotypes. For instance, while some  
372 mutations result in increased A $\beta$  deposition and altered plaque structure, other mutations at the same  
373 location result in cerebral amyloid angiopathy with A $\beta$  deposition in blood vessels rather than the  
374 brain parenchyma or even an absence of extracellular A $\beta$  deposition<sup>15,28,82,83,30,65,73,77–81</sup>. In addition,  
375 some of these mutants showed increased intracellular A $\beta$  accumulation which differed in structure-  
376 specific staining characteristics<sup>83–85</sup>. The differences in A $\beta$  pathology between these mutants seem to  
377 display some similarities to the changes we observed between our AM and AM;*Serf2*<sup>br/-</sup> mice.  
378 Together with the *in vitro* findings about the mechanism of SERF2 interaction with aggregation-prone  
379 proteins, this would appear to suggest modulation of intra-molecular interactions and altered  
380 nucleation as the mechanism for SERF2's effect on aggregation and amyloid formation in our mice.  
381 Interestingly, there is increasing evidence that qualitative, structural properties may be more related to  
382 toxicity than the quantity of aggregates and deposits. Recent studies have provided increasing  
383 evidence that structural polymorphs are associated with differences in toxicity and different clinical  
384 phenotypes in sporadic and familial cases<sup>40,41,47–49</sup>. One recent study demonstrated that these structural  
385 conformations of distinct disease phenotypes could also be detected by differences in the LCO spectra  
386 of the plaques and that these spectral properties could, at least partially, be transmitted to a mouse  
387 model through seeding<sup>49</sup>. While the effect of familial mutations on the formation of distinct  
388 polymorphs has already been explored by others<sup>49,84–86</sup>, our study provides the first evidence of a  
389 single endogenous factor, separate from A $\beta$  and its production pathway, contributing to a structural



390 shift of amyloid pathology in a mammalian system. Further research will be needed to elucidate the  
391 exact structural changes at an atomic level and if they affect toxicity and disease progression similarly  
392 to what was previously observed in *C. elegans*. This will provide new insights into the structural  
393 properties and diversity of disease-protein aggregation, contributing to a better understanding of the  
394 variability in disease manifestation and open up previously unexplored avenues for therapeutic  
395 research.

## 396 **Materials and methods**

### 397 *Animals*

398 *Serf2* knockout mice were generated by introducing *loxP* sites in the *Serf2* gene on either side of exon  
399 2, in accordance with the ‘knockout-first’ allele design as described by Skarnes and colleagues<sup>87</sup>. Full-  
400 body *Serf2* knockout mice were obtained by crossing these floxed mice with 129SV mice expressing  
401 *Cre* under the *Hprt* promoter, resulting in the removal of exon 2 by *Cre*-mediated recombination  
402 (Figure S1A). Subsequently, these mice with mixed background were backcrossed at least 6 times to a  
403 C57Bl/6J background. Homozygous and heterozygous full-body *Serf2* knockout mice were examined  
404 with their wild-type littermates at embryonic day 13.5, 15.5 and 17.5, as well as at the day of birth  
405 (P0) and day of weaning (P22).

406 Heterozygous *Sox1-Cre* mice<sup>58</sup> were backcrossed at least 8 times to a C57BL/6J background. These  
407 animals were also used as controls to differentiate between effects of *Cre* expression and *Serf2*  
408 knockout. To generate the conditional *Serf2* knockout mice, the floxed mice were first crossed with  
409 Tg(ACTFLPe)9205Dym (Jackson#003800) mice to flip the FRT site and remove the lacZ and neo  
410 cassette. Subsequently, these mice were backcrossed at least 6 times to a C57BL/6J background.  
411 Finally, the resulting homozygous *Serf2*<sup>flox/flox</sup> mice were crossed with the backcrossed *Sox1-Cre* mice,  
412 to obtain the brain-specific *Serf2* knockout mice (Figure S3A). The conditional *Serf2* knockout mice  
413 were crossed with the APPPS1-21 transgenic mice (APP (KM670/671NL)/PS1(L166P), Rottenburg,  
414 Germany)<sup>61</sup>. A final cross between heterozygous APPPS1-21; *Serf2*<sup>flox/flox</sup> and heterozygous *Sox1-Cre*;  
415 *Serf2*<sup>flox/flox</sup> resulted in four experimental groups of *Serf2*<sup>flox/flox</sup> mice: *Sox1-Cre*<sup>-/-</sup>; APPPS1-21<sup>-/-</sup> (WT),

416 *Sox1-Cre<sup>+/-</sup>*; APPPS1-21<sup>-/-</sup> (*Serf2<sup>br/-</sup>*), *Sox1-Cre<sup>-/-</sup>*; APPPS1-21<sup>+/-</sup> (AM) and *Sox1-Cre<sup>+/-</sup>*; APPPS1-21<sup>+/-</sup>  
417 (AM;*Serf2<sup>br/-</sup>*) (Figure 2A). All experimental groups were tested at 1 month or 3 months of age.

418 All experiments were approved by the Institutional Animal Care and Use Committee of the University  
419 of Groningen (Groningen, The Netherlands). All mice were maintained on a C57BL/6J background  
420 and housed in a 12:12 hour light/dark cycle and the animals had ad libitum access to food and water.  
421 Genotyping of embryos was performed using tail and yolk sac biopsies. Otherwise, ear biopsies were  
422 used. DNA was purified using prepGEM® Tissue kit according to a protocol adapted from the  
423 manufacturer (ZYGEPTI0500, ZyGEM, VWR International BV) and subjected to PCR using the  
424 primers listed in Supplemental Table S5. Mice were terminated through CO<sub>2</sub>-inhalation and cervical  
425 dislocation for subsequent tissue collection.

#### 426 *Embryo processing and histochemistry*

427 Embryos were fixed in 4 % formalin (Kinipath) for a minimum of 24 hours at room temperature. For  
428 the pathological analysis, the embryos and their placenta were bisected longitudinally and embedded  
429 in paraffin. Using the microm HM 340E (Thermo Scientific) 4 µm sections were cut for the  
430 hematoxylin-eosin (HE) staining. The HE sections were incubated at 60 °C for 15 minutes. Next,  
431 sections were deparaffinized and rehydrated in xylene (2x), 100 % alcohol (2x), 96 % alcohol, 70 %  
432 alcohol and water. HE staining was performed by incubation with hematoxylin for 4 minutes, water  
433 for 10 minutes, eosin for 1 minute and water for 10 seconds. After staining all sections were  
434 dehydrated in 70 % alcohol, 96 % alcohol, 100 % alcohol (2x) and xylene (2x).

#### 435 *Brain processing*

436 Upon termination, all brains were collected and weighed. From each experimental group three whole  
437 brains were collected for HE staining according to the protocol described under embryo processing.  
438 HE-stained sections were scanned with the TissueFAXs microscope using 20X objective. Images were  
439 processed for nuclei counts using Histoquest software. The remaining brains were divided sagittally.  
440 The left hemibrain was prepared for histochemistry and fixed in 4 % paraformaldehyde (PFA) for 48

441 hours at room temperature on a shaker. Next, the brains were placed in 30 % sucrose for  
442 approximately 12 hours. Afterwards, the excess sucrose was removed and hemibrains were frozen in  
443 molds with Tissue Tek O.C.T. compound (Sakura, The Netherlands) on dry ice. The right hemibrain  
444 was snap frozen in liquid nitrogen and stored at -80°C. This tissue was homogenized using a liquid  
445 nitrogen cooled mortar for subsequent protein and RNA analysis.

#### 446 *Quantitative RT-PCR*

447 Total RNA was extracted from snap frozen tissue using TRIzol Reagent (Life Technologies) according  
448 to the manufacturers' description. Total RNA quality and concentration were assessed using a  
449 NanoDrop 2000 spectrophotometer (Thermo Scientific/Isogen Life Science). cDNA was made from  
450 1,5 µg total RNA with a RevertAid H Minus First Strand cDNA Synthesis kit (Thermo Scientific)  
451 using random hexamer primers. Quantitative real-time PCR was performed using a Roche LightCycler  
452 480 Instrument II (Roche Diagnostics) with SYBR green dye (Bio-Rad Laboratories) to detect DNA  
453 amplification. Relative transcript levels were quantitated using a standard curve of pooled cDNA  
454 solutions. Expression levels were normalized to  $\beta$ -Actin or 18S mRNA levels. The primers for  
455 Quantitative PCR used are listed in Supplemental Table S5.

#### 456 *Western Blot analysis*

457 For SERF2 analysis tissues were homogenized in RIPA buffer (50 mM Tris pH 8, 150 mM NaCl,  
458 5mM EDTA, 0.5 % SDS, 0.5 % SDO, 1 % NP-40) with protease inhibitor cocktail (Roche) and  
459 incubated on ice for 1 hour, spun down at 13,300 rpm for 30 minutes at 4 °C and the supernatant was  
460 collected. Protein measurements were performed using a BCA kit (Pierce) and 150 µg was loaded on a  
461 10-20 % tris/tricine SDS-page gels (Bio-Rad Laboratories) and blotted onto 0,2 µm nitrocellulose  
462 membrane (Bio-Rad Laboratories). Membranes were incubated overnight with SERF2 (1/1500,  
463 Protein tech) or Actin (1/10 000, MP biomedical) antibody. Next, the membranes were incubated  
464 with anti-mouse or –rabbit secondary antibodies tagged with horseradish peroxidase (1/10 000, Bio-  
465 Rad Laboratories) for one hour at room temperature and visualized by chemiluminescence (Amersham  
466 ECL prime western blotting detection reagent, VWR).

467 *RNA sequencing*

468 RNA sequencing analysis was performed on three MEF cell lines from *Serf2*<sup>-/-</sup> mice and four *Serf2*<sup>+/+</sup>  
469 littermate controls. Total RNA was isolated from MEFs using the Qiagen RNeasy isolation kit.  
470 Integrity of the RNA based on RIN scores as determined by a Bioanalyzer (Agilent). RNA-sequencing  
471 libraries were prepared using TruSeq Stranded Total RNA with Ribo-Zero Human/Mouse/Rat (RS-  
472 122-2201; Illumina, CA, USA) according to manufacturers' protocol. Pooled libraries were sequenced  
473 on an Illumina HiSeq 2500 (single-end 50 bp). Reads were aligned to the mouse reference genome  
474 (mm10) using a splicing-aware aligner (StarAligner). Aligned reads were normalized to fragments per  
475 million (FPM), excluding low abundance genes (mean FPM>1 in at least two samples). The raw count  
476 data were pre-processed using the programming language R (3.4.0) [R Core Team, 2016, available  
477 online at: [www.r-project.org](http://www.r-project.org)], the program RStudio (1.0.143) [RStudio Team, 2016, available online  
478 at: <http://www.rstudio.com/>] and the EdgeR package (3.18.0)(Robinson et al., 2010). Genes that  
479 displayed FPM value >1 in at least two libraries were retained, resulting in a list of 12,808 genes for  
480 differential analysis. Differentially expressed (DE) genes between the *Serf2*<sup>+/+</sup> and *Serf2*<sup>-/-</sup> MEFs were  
481 identified using the EdgeR general linear model approach. After statistical correction for multiple  
482 comparisons with the "false discovery rate" (FDR) method (FDR<0.05), a list of 738 DE genes was  
483 obtained. DAVID (6.8) was used to perform functional annotation analyses on this gene list and to  
484 identify significantly enriched gene ontology (GO) terms [using GOTERM\_BP\_DIRECT]<sup>88,89</sup>. The  
485 connectivity between the enriched GO terms was further examined by determining the amount of  
486 associated genes found (AGF) that were shared between two GO terms. The most significant  
487 relationships (where a GO term shared > 25 % of the AGF) were mapped in a network using the  
488 igraph package (1.0.1). The color of the edges reflects the major node, with the largest amount of  
489 AGF, in each relationship. The weight of the edges was determined by the percentage of AGF shared  
490 by the minor node in the relationship. We defined three clusters of GO-terms, where multiple minor  
491 GO-terms connected to one or two central, major GO-terms. Minor GO-terms were always clustered  
492 with the major GO-term with whom they shared the strongest connection. One GO term, positive

493 regulation of the apoptotic process, showed no direct relation with one of the major GO-terms and was  
494 therefore assigned to the only cluster it had a significant connection with (Figure S2A-B).

#### 495 *ELISA*

496 The ELISA experiments were performed as described previously<sup>90</sup>. Briefly, the frozen brain samples  
497 were homogenized in tissue protein extraction reagent (Pierce) supplemented with complete protease  
498 inhibitors (Roche), and centrifuged for 1 hour at 430 000 g at 4 °C. The supernatant was used for  
499 ELISA. The A $\beta$ <sub>40</sub> and A $\beta$ <sub>42</sub> levels were determined by standard sandwich ELISAs using end-specific  
500 antibodies (Janssen Pharmaceutical), and the monoclonal JRFcA $\beta$ <sub>40</sub>/28 and JRFcA $\beta$ <sub>42</sub>/26 antibodies as  
501 the capture antibodies. Horseradish peroxidase conjugated JRFA $\beta$ N/25 or JRFA $\beta$ N/25 were used as  
502 the detection antibodies for, respectively, human A $\beta$  or murine A $\beta$ . Samples were loaded in triplicate  
503 for each ELISA. The ELISAs were performed in triplicate for the 3-month-old animals and in  
504 duplicate for the 1-month-old animals.

#### 505 *Brain immunohistochemistry*

506 To evaluate A $\beta$ -related pathology, the brain was cut in 30  $\mu$ m thick serial cryostat sections. A series of  
507 sections was selected with 300  $\mu$ m spacing between individual sections and blind-coded, 6 per mouse  
508 for the 6E10 and Iba1 antibody and 3 per mouse for W02. Sections were fixed in 4 % PFA for 10  
509 minutes, followed by 20 minutes antigen retrieval in citrate acid (pH 6.0) and 30 minutes in 1 % H<sub>2</sub>O<sub>2</sub>  
510 in methanol. Next the sections were incubated for 1 hour in 10 % goat or donkey serum, depending on  
511 the secondary antibody, and immunolabeled overnight with antibodies against A $\beta$ , and Iba1  
512 (Supplemental Table S6). The sections were washed and incubated with the complementary  
513 biotinylated secondary antibody (1/500, Jackson Immunoresearch) for 2 hours. Next, sections were  
514 incubated in ABC complex and reacted with diamino-benzidine (0.5 mg/ml H<sub>2</sub>O with 0.01 % H<sub>2</sub>O<sub>2</sub>).  
515 The stained sections were scanned with the TissueFAXs microscope using 20X objective. All images  
516 were analyzed using the Fiji platform of the ImageJ software<sup>91</sup>. For unbiased feature detection we used  
517 a single automated script with optimized threshold method and parameters for the complete image set  
518 of each staining method.

519 *Thioflavin-S Staining*

520 A 300  $\mu\text{m}$ -spaced series of three blind-coded 30  $\mu\text{m}$  sections were fixed in 4 % PFA for 10 min,  
521 followed by incubation in 0.25 % potassium permanganate solution for 15 min, and a bleaching step  
522 with 1 % potassium metabisulfite/1 % oxalic acid for 5 min, incubation with 0.02 % Thioflavin-S  
523 solution in 50 % ethanol (Sigma T1892) for 8 minutes, rinsed with water between every step. Finally  
524 the sections were incubated with 1  $\mu\text{l/ml}$  DAPI. The sections were analyzed as described for the  
525 immunostained sections. Stained sections were scanned with the TissueFAXs microscope using 20X  
526 objective. Images were processed using Tissuequest software, selecting the cortex for automated  
527 analyses.

528 *Luminescent conjugated oligothiophene (LCO) staining*

529 For the Luminescent conjugated oligothiophenes (LCO) stainings, two different LCO variants,  
530 qFTAA (quadro-formyl thiophene acetic acid) and hFTAA (hepta-formyl thiophene acetic acid) were  
531 used. Blind-coded 30  $\mu\text{m}$  sections were double-stained with qFTAA and hFTAA (2.4  $\mu\text{M}$  qFTAA and  
532 0.77  $\mu\text{M}$  hFTAA in PBS) similar to a previous description (Nyström et al., 2013). Sections were  
533 incubated for 30 minutes in the dark at room temperature. Stainings were analyzed on the Zeiss LSM  
534 510 META confocal microscope equipped with an argon 458 nm laser (Carl Zeiss MicroImaging  
535 GmbH, Jena, Germany). An 40x objective (oil-immersion, 1.3 NA, Zeiss) was used for spectral  
536 imaging of the A $\beta$  deposits. Stacked images were acquired every 10 nm in the emission spectrum  
537 between 470 to 695 nm. Locations were selected randomly from the plaque containing regions of the  
538 temporal, frontal and occipital cortex. Images were analyzed using Fiji (Schindelin et al., 2012, 2015)  
539 and standard computer algorithms to provide a reproducible, unbiased detection of the plaques. First,  
540 the stacks of images across the different wavelengths of the spectrum were combined into one image  
541 using the Z-projection sum. A threshold was applied to the resulting image using the “Triangle dark”  
542 algorithm to automatically identify and delineate the plaques. Partial plaques on the edge of the images  
543 and particles smaller than 25  $\mu\text{m}^2$  were excluded. These settings allowed us to detect over 98 % of all  
544 the plaques in the images. The missed plaques were either too small or too low in intensity to be

545 accurately distinguished from the background. Incorrectly identified particles due to (lipofuscin) auto  
546 fluorescence were readily identified based on their wavelength intensity profile and visual inspection  
547 and were also excluded from the analysis. We identified between 17-25 plaques in each animal for the  
548 spectral intensity measurements. The ratio of the intensity of emitted light at the blue-shifted portion  
549 (502 nm) and red-shifted peak (588 nm) was used as a parameter for spectral distinction of different  
550 A $\beta$  deposits. These peaks of the spectra were selected to maximize the spectral distinction.

### 551 *Large-scale STEM (nanotomy)*

552 The scanning transmission electron microscopy (STEM) experiments were adapted from previously  
553 described experiments (Kuipers et al., 2015). Briefly, paraffin embedded cortical sections of AM and  
554 AM;*Serf2*<sup>br/-</sup> were deparaffinized and postfixed with 1 % osmium tetroxide/1.5 % potassium  
555 ferrocyanide in 0.1 M sodium cacodylate, dehydrated through ethanol and embedded in EPON (Serva)  
556 using a tissue processor (Leica EM TP 709202). Ultrathin sections (80 nm) were cut using the Leica  
557 uc7 ultramicrotome and collected on formvar coated copper grids (electron microscopy sciences,  
558 Hatfield, Pennsylvania). A large area scan using Scanning Transmission Detection was made using a  
559 Zeiss supra55 SEM with Atlas. STEM detection with a four quadrant STEM detector was used in  
560 inverted darkfield mode, at 28 kV with 30  $\mu$ m aperture at 3.5 mm working distance. All images were  
561 recorded at the same scan speed (cycle time 1.5 minute at 3072 $\times$ 2304 pixels). Contrast and brightness  
562 were set based on a live histogram. High resolution large-scale STEM images at 2.5 nm pixel size  
563 were generated with the external scan generator ATLAS (Fibics, Canada), individual tiles were  
564 stitched in VE viewer (Fibics, Canada), exported as a html-file and uploaded to the website  
565 [www.nanotomy.org](http://www.nanotomy.org).

### 566 *Cell culture*

567 Mouse embryonic fibroblasts (MEFs) were isolated from *Serf2*<sup>+/+</sup>, *Serf2*<sup>+/-</sup> and *Serf2*<sup>-/-</sup> E13.5 embryos.  
568 MEFs were cultured in T75 culture flasks (Greiner Bio-One, 658175), high-glucose Dulbecco's  
569 modified Eagle's medium (Gibco), supplemented with 10% fetal bovine serum (Sigma 12133C), 1 %

570 penicillin/streptomycin (Gibco), non-essential amino acids (Gibco) and  $\beta$ -mercaptoethanol at 37°C, 5  
571 % CO<sub>2</sub> and 3 % O<sub>2</sub>. E13.5 embryos. Wild-type HEK293T and two independent clonal lines of  
572 CRISPR *Serf2* KO mutant HEK 293T cells were cultured in Dulbecco's Modified Eagle Medium  
573 (DMEM, Gibco; high glucose, pyruvate, 41966052), supplemented with 10 % Bovine Cow Serum  
574 (BCS; Sigma 12133C) and 1 % Penicillin/Streptomycin (Gibco; 10 000 U/mL, 15140122), at 37 °C, 5  
575 % CO<sub>2</sub>. For passaging of cells, 0.05 % Trypsin-EDTA (1X), Phenol Red (Invitrogen; 25300-054) was  
576 used. Regular mycoplasma tests were performed.

### 577 *Cell proliferation assay*

578 For the proliferation assay, 200 000 cells of each cell line were plated in triplicate in a standard 12-  
579 well plate and incubated inside the IncuCyte Zoom Live-Cell Imaging System (Essen Bioscience) for  
580 over 100 hours. The Incucyte system captured phase contrast images with a 10X magnification every 2  
581 hours at nine distinct locations in each well to determine average confluency as a measure of cell  
582 growth. The quantification was performed using the IncuCyte Zoom software. The growth experiment  
583 was repeated three times. The confluency data of each experiment was normalized by min-max scaling  
584 and the average of the three experiments was plotted (solid line) with the standard deviation (dashed  
585 lines).

### 586 *Statistical analysis*

587 Unless specified otherwise, statistical analysis was performed using Graphpad v7.02. The exact  
588 statistical test used for each comparison is specified in the main body of the text, together with the  
589 resulting p-values. In the case of multiple comparisons, a post-hoc analysis with Bonferroni correction  
590 was performed. Any corrected p-values derived from this post-hoc analysis are indicated in the text as  
591  $p_{\text{bon}}$ .

### 592 **Data availability**



593 RNA-seq data have been deposited in the ArrayExpress database at EMBL-EBI  
594 ([www.ebi.ac.uk/arrayexpress](http://www.ebi.ac.uk/arrayexpress)) under accession number E-MTAB-10083.  
595 (<http://www.ebi.ac.uk/arrayexpress/experiments/E-MTAB-10083>)

596 Nanotomy datasets are open access available via the repository website  
597 [www.nanotomy.org/PW/temp02/EllenNollen](http://www.nanotomy.org/PW/temp02/EllenNollen).

598 *[to be deleted] Upon acceptance of this work the data will be open access available, without*  
599 *password. Pending acceptance, the website can only be accessed by collaborators and reviewers*

600

## 601 **Acknowledgments**

602 All LCOs were kindly provided by K. Peter R. Nilsson, Linköping University, Sweden. Part of the  
603 work has been performed in the UMCG Microscopy and Imaging Center (UMIC), sponsored by  
604 ZonMW grant 91111.006 and NWO 40-00506-98-9021. We thank Ben Giepmans for advise on EM  
605 studies. This project was funded by a Meervoud Grant from NWO (836.09.001) (to E.A.A.N.), a  
606 European Research Council (ERC) starting grant (281622 PDControl) (to E.A.A.N.), the Alumni  
607 chapter Gooische Groningers facilitated by the Ubbo Emmius Fonds (to E.A.A.N), an Aspasia  
608 fellowship from NWO (015.014.005) (to E.A.A.N.).

## 609 **Author Contributions**

610 E.S., O.S., L.J. and E.A.A. conceptualized the project. E.S., L.J., O.S. and W.H. performed initial  
611 sample collection, sample processing and validation experiments verifying the Serf2 KO models and  
612 controls. M.K., L.H., S.A.Y. and A.d.B. provided the embryonic morphological and histological  
613 assessment. N.B. and M.J. provided the LCO staining and confocal imaging. A.H.G.W. performed the  
614 large-scale STEM imaging. B.B. and F.F. provided assistance in the isolation and RNA seq analysis of  
615 the MEFs. A.T. performed western blotting and ELISA measurements for APP and A $\beta$  content.

616 B.v.d.S. and J.v.D. generated the initial Serf2KO animals. L.J. performed the data analysis and wrote  
617 the manuscript in collaboration with E.S. and E.A.A.

618

619 **Conflict of Interests**

620 The authors declare that they have no conflict of interest.

621 **References**

- 622 1. Glenner, G. G. & Wong, C. W. Alzheimer's disease: Initial report of the purification and  
623 characterization of a novel cerebrovascular amyloid protein. *Biochem. Biophys. Res. Commun.*  
624 (1984). doi:10.1016/S0006-291X(84)80190-4
- 625 2. Masters, C. L. *et al.* Amyloid plaque core protein in Alzheimer disease and Down syndrome.  
626 *Proc. Natl. Acad. Sci. U. S. A.* **82**, 4245–4249 (1985).
- 627 3. Grundke-Iqbal, I. *et al.* Microtubule-associated protein tau. A component of Alzheimer paired  
628 helical filaments. *J. Biol. Chem.* **261**, 6084–6089 (1986).
- 629 4. Grundke-Iqbal, I. *et al.* Abnormal phosphorylation of the microtubule-associated protein tau  
630 (tau) in Alzheimer cytoskeletal pathology. *Proc. Natl. Acad. Sci. U. S. A.* **83**, 4913–4917  
631 (1986).
- 632 5. Langley, C. H. & Charlesworth, B. *Nature* © Macmillan Publishers Ltd 1997 expansion of  
633 *xenotransplantation*. (1997).
- 634 6. Scherzinger, E. *et al.* Self-assembly of polyglutamine-containing huntingtin fragments into  
635 amyloid-like fibrils: Implications for Huntington's disease pathology (huntingtinglutamine  
636 repeataggregation). *Medical Sciences Communicated by Max F. Perutz, Medical Research*  
637 *Council* **96**, 4604–4609 (1999).
- 638 7. Goate, A. *et al.* Segregation of a missense mutation in the amyloid precursor protein gene with  
639 familial Alzheimer's disease. *Nature* **349**, 704–706 (1991).
- 640 8. Chartier-Harlin, M.-C. *et al.* Early-onset Alzheimer's disease caused by mutations at codon 717  
641 of the  $\beta$ -amyloid precursor protein gene. *Nature* **353**, 844–846 (1991).
- 642 9. Citron, M. *et al.* Mutation of the  $\beta$ -amyloid precursor protein in familial Alzheimer's disease

- 643 increases  $\beta$ -protein production. *Nature* (1992). doi:10.1038/360672a0
- 644 10. Eckman, C. B. *et al.* A new pathogenic mutation in the APP gene (I716V) increases the relative  
645 proportion of A beta 42(43). *Hum. Mol. Genet.* **6**, 2087–9 (1997).
- 646 11. Murrell, J. R., Hake, A. M., Quaid, K. A., Farlow, M. R. & Ghetti, B. Early-Onset Alzheimer  
647 Disease Caused by a New Mutation (V717L) in the Amyloid Precursor Protein Gene. *Arch.*  
648 *Neurol.* **57**, 885 (2000).
- 649 12. Kumar-Singh, S. *et al.* Nonfibrillar diffuse amyloid deposition due to a gamma(42)-secretase  
650 site mutation points to an essential role for N-truncated A beta(42) in Alzheimer’s disease.  
651 *Hum. Mol. Genet.* **9**, 2589–98 (2000).
- 652 13. Cruts, M. *et al.* Novel APP mutation V715A associated with presenile Alzheimer’s disease in a  
653 German family. *J Neurol* **250**, 1374–1375 (2003).
- 654 14. Kumar-Singh, S. *et al.* Mean age-of-onset of familial Alzheimer disease caused by presenilin  
655 mutations correlates with both increased A $\beta$ 42 and decreased A $\beta$ 40. *Hum. Mutat.* (2006).  
656 doi:10.1002/humu.20336
- 657 15. Tomiyama, T. *et al.* A new amyloid  $\beta$  variant favoring oligomerization in Alzheimer’s-type  
658 dementia. *Ann. Neurol.* **63**, 377–387 (2008).
- 659 16. Schellenberg, G. *et al.* Genetic linkage evidence for a familial Alzheimer’s disease locus on  
660 chromosome 14. *Science* (80-. ). **258**, 668–671 (1992).
- 661 17. Sherrington, R. *et al.* Cloning of a gene bearing missense mutations in early-onset familial  
662 Alzheimer’s disease. *Nature* **375**, 754–760 (1995).
- 663 18. Borchelt, D. R. *et al.* Familial Alzheimer’s disease-linked presenilin I variants elevate a $\beta$ 1-  
664 42/1-40 ratio in vitro and in vivo. *Neuron* (1996). doi:10.1016/S0896-6273(00)80230-5

- 665 19. Lemere, C. A. *et al.* The E280A presenilin 1 Alzheimer mutation produces increased A beta 42  
666 deposition and severe cerebellar pathology. *Nat. Med.* **2**, 1146–50 (1996).
- 667 20. Guerreiro, R. J. *et al.* Genetic screening of Alzheimer’s disease genes in Iberian and African  
668 samples yields novel mutations in presenilins and APP. *Neurobiol. Aging* **31**, 725–731 (2010).
- 669 21. Rogae, E. I. *et al.* Familial Alzheimer’s disease in kindreds with missense mutations in a gene  
670 on chromosome 1 related to the Alzheimer’s disease type 3 gene. *Nature* **376**, 775–778 (1995).
- 671 22. Citron, M. *et al.* Mutant presenilins of Alzheimer’s disease increase production of 42-residue  
672 amyloid beta-protein in both transfected cells and transgenic mice. *Nat. Med.* **3**, 67–72 (1997).
- 673 23. Müller, U., Winter, P., Bolender, C. & Nolte, D. Previously Unrecognized Missense Mutation  
674 E126K of PSEN2 Segregates with Early Onset Alzheimer’s Disease in a Family. *J. Alzheimer’s*  
675 *Dis.* **42**, 109–113 (2014).
- 676 24. Haass, C. *et al.* The Swedish mutation causes early-onset Alzheimer’s disease by beta-secretase  
677 cleavage within the secretory pathway. *Nat. Med.* **1**, 1291–6 (1995).
- 678 25. Suzuki, N. *et al.* An increased percentage of long amyloid  $\beta$  protein secreted by familial  
679 amyloid  $\beta$  protein precursor ( $\beta$ APP717) mutants. *Science* (80-. ). (1994).  
680 doi:10.1126/science.8191290
- 681 26. Duff, K. *et al.* Increased amyloid- $\beta$ 42(43) in brains of mice expressing mutant presenilin 1.  
682 *Nature* (1996). doi:10.1038/383710a0
- 683 27. Murayama, O. *et al.* Enhancement of amyloid  $\beta$  42 secretion by 28 different presenilin 1  
684 mutations of familial Alzheimer’s disease. *Neurosci. Lett.* **265**, 61–63 (1999).
- 685 28. Nilsberth, C. *et al.* The ‘Arctic’ APP mutation (E693G) causes Alzheimer’s disease by  
686 enhanced A $\beta$  protofibril formation. *Nat. Neurosci.* **4**, 887–893 (2001).

- 687 29. Miravalle, L. *et al.* Substitutions at Codon 22 of Alzheimer's A Peptide Induce Diverse  
688 Conformational Changes and Apoptotic Effects in Human Cerebral Endothelial Cells\*. (2000).  
689 doi:10.1074/jbc.M003154200
- 690 30. Ni, C.-L., Shi, H.-P., Yu, H.-M., Chang, Y.-C. & Chen, Y.-R. Folding stability of amyloid- $\beta$  40  
691 monomer is an important determinant of the nucleation kinetics in fibrillization. *FASEB J.* **25**,  
692 1390–1401 (2011).
- 693 31. Conway, K. A., Harper, J. D. & Lansbury, P. T. Accelerated in vitro fibril formation by a  
694 mutant  $\alpha$ -synuclein linked to early-onset Parkinson disease. *Nat. Med.* (1998).  
695 doi:10.1038/3311
- 696 32. Narhi, L. *et al.* Both Familial Parkinson's Disease Mutations Accelerate  $\alpha$ -Synuclein  
697 Aggregation. *J. Biol. Chem.* **274**, 9843–9846 (1999).
- 698 33. Conway, K. A. *et al.* Acceleration of oligomerization, not fibrillization, is a shared property of  
699 both  $\alpha$ -synuclein mutations linked to early-onset Parkinson's disease: Implications for  
700 pathogenesis and therapy. *Proc. Natl. Acad. Sci. U. S. A.* (2000). doi:10.1073/pnas.97.2.571
- 701 34. Ghosh, D. *et al.* The Parkinson's Disease-Associated H50Q Mutation Accelerates  $\alpha$ -Synuclein  
702 Aggregation *in Vitro*. *Biochemistry* **52**, 6925–6927 (2013).
- 703 35. Ghosh, D. *et al.* The Newly Discovered Parkinson's Disease Associated Finnish Mutation  
704 (A53E) Attenuates  $\alpha$ -Synuclein Aggregation and Membrane Binding. *Biochemistry* **53**, 6419–  
705 6421 (2014).
- 706 36. Choi, W. *et al.* Mutation E46K increases phospholipid binding and assembly into filaments of  
707 human  $\alpha$ -synuclein. *FEBS Lett.* **576**, 363–368 (2004).
- 708 37. Cooper, J. K. *et al.* Truncated N-terminal fragments of huntingtin with expanded glutamine  
709 repeats form nuclear and cytoplasmic aggregates in cell culture. *Hum. Mol. Genet.* (1998).

710 doi:10.1093/hmg/7.5.783

711 38. Nekooki-Machida, Y. *et al.* Distinct conformations of in vitro and in vivo amyloids of  
712 huntingtin-exon1 show different cytotoxicity. *Proc. Natl. Acad. Sci. U. S. A.* **106**, 9679–84  
713 (2009).

714 39. Sun, C.-S. *et al.* Conformational switch of polyglutamine-expanded huntingtin into benign  
715 aggregates leads to neuroprotective effect. *Sci. Rep.* **5**, 14992 (2015).

716 40. Cohen, M. L. *et al.* Rapidly progressive Alzheimer's disease features distinct structures of  
717 amyloid- $\beta$ . *Brain* **138**, 1009–1022 (2015).

718 41. Qiang, W., Yau, W.-M., Lu, J.-X., Collinge, J. & Tycko, R. Structural variation in amyloid- $\beta$   
719 fibrils from Alzheimer's disease clinical subtypes. *Nature* **541**, 217–221 (2017).

720 42. Bousset, L. *et al.* Structural and functional characterization of two alpha-synuclein strains. *Nat.*  
721 *Commun.* **4**, 2575 (2013).

722 43. Heise, H. *et al.* Solid-State NMR Reveals Structural Differences between Fibrils of Wild-Type  
723 and Disease-Related A53T Mutant  $\alpha$ -Synuclein. *J. Mol. Biol.* **380**, 444–450 (2008).

724 44. Li, B. *et al.* Cryo-EM of full-length  $\alpha$ -synuclein reveals fibril polymorphs with a common  
725 structural kernel. *Nat. Commun.* **9**, 3609 (2018).

726 45. Guerrero-Ferreira, R. *et al.* Two new polymorphic structures of alpha-synuclein solved by  
727 cryo-electron microscopy. *bioRxiv* 654582 (2019). doi:10.1101/654582

728 46. Gath, J. *et al.* Unlike Twins: An NMR Comparison of Two  $\alpha$ -Synuclein Polymorphs Featuring  
729 Different Toxicity. *PLoS One* **9**, e90659 (2014).

730 47. Cohen, E. *et al.* Reduced IGF-1 Signaling Delays Age-Associated Proteotoxicity in Mice. *Cell*

- 731           **139**, 1157–1169 (2009).
- 732   48.   Lu, J. X. *et al.* Molecular structure of  $\beta$ -amyloid fibrils in alzheimer's disease brain tissue. *Cell*  
733           (2013). doi:10.1016/j.cell.2013.08.035
- 734   49.   Rasmussen, J. *et al.* Amyloid polymorphisms constitute distinct clouds of conformational  
735           variants in different etiological subtypes of Alzheimer's disease. *Proc. Natl. Acad. Sci.* **114**,  
736           13018–13023 (2017).
- 737   50.   van Ham, T. J. *et al.* Identification of MOAG-4/SERF as a regulator of age-related  
738           proteotoxicity. *Cell* **142**, 601–612 (2010).
- 739   51.   Falsone, S. F. *et al.* SERF Protein Is a Direct Modifier of Amyloid Fiber Assembly. *Cell Rep.*  
740           **2**, 358–371 (2012).
- 741   52.   Yoshimura, Y. *et al.* MOAG-4 promotes the aggregation of  $\alpha$ -synuclein by competing with  
742           self-protective electrostatic interactions. *J. Biol. Chem.* **292**, 8269–8278 (2017).
- 743   53.   Merle, D. A. *et al.* Increased Aggregation Tendency of Alpha-Synuclein in a Fully Disordered  
744           Protein Complex. *J. Mol. Biol.* **431**, 2581–2598 (2019).
- 745   54.   Kaufman, M. H. *The Atlas of Mouse Development.* (Elsevier Science, 1992).
- 746   55.   Kaufman, M. H. & Bard, J. B. L. *The Anatomical Basis of Mouse Development.* (Elsevier  
747           Science, 1999).
- 748   56.   Ward, J. M., Elmore, S. A. & Foley, J. F. Pathology Methods for the Evaluation of Embryonic  
749           and Perinatal Developmental Defects and Lethality in Genetically Engineered Mice. *Vet.*  
750           *Pathol.* **49**, 71–84 (2012).
- 751   57.   Ciemerych, M. A. & Sicinski, P. Cell cycle in mouse development. *Oncogene* (2005).



- 752           doi:10.1038/sj.onc.1208608
- 753   58.   Takashima, Y. *et al.* Neuroepithelial Cells Supply an Initial Transient Wave of MSC  
754       Differentiation. *Cell* **129**, 1377–1388 (2007).
- 755   59.   Pevny, L. H., Sockanathan, S., Placzek, M. & Lovell-Badge, R. A role for SOX1 in neural  
756       determination. *Development* (1998).
- 757   60.   Wood, H. B. & Episkopou, V. Comparative expression of the mouse Sox1, Sox2 and Sox3  
758       genes from pre-gastrulation to early somite stages. *Mech. Dev.* (1999). doi:10.1016/S0925-  
759       4773(99)00116-1
- 760   61.   Radde, R. *et al.* Abeta42-driven cerebral amyloidosis in transgenic mice reveals early and  
761       robust pathology. *EMBO Rep.* **7**, 940–6 (2006).
- 762   62.   Klingstedt, T. *et al.* Synthesis of a library of oligothiophenes and their utilization as fluorescent  
763       ligands for spectral assignment of protein aggregates. *Org. Biomol. Chem.* **9**, 8356–70 (2011).
- 764   63.   Psonka-Antonczyk, K. M. *et al.* Nanoscale Structure and Spectroscopic Probing of A $\beta$ 1-40  
765       Fibril Bundle Formation. *Front. Chem.* (2016). doi:10.3389/fchem.2016.00044
- 766   64.   Nyström, S. *et al.* Evidence for Age-Dependent in Vivo Conformational Rearrangement within  
767       A $\beta$  Amyloid Deposits. *ACS Chem. Biol.* **8**, 1128–1133 (2013).
- 768   65.   Lord, A. *et al.* Observations in APP bitransgenic mice suggest that diffuse and compact plaques  
769       form via independent processes in Alzheimer’s disease. *Am. J. Pathol.* **178**, 2286–2298 (2011).
- 770   66.   Meyer, N. H. *et al.* Structural fuzziness of the RNA-organizing protein SERF1a determines a  
771       toxic gain-of-interaction. *bioRxiv* 713511 (2019). doi:10.1101/713511
- 772   67.   Murray, S. A. *et al.* Mouse Gestation Length Is Genetically Determined. *PLoS One* **5**, e12418

- 773 (2010).
- 774 68. Visintin, R. & Amon, A. The nucleolus: the magician's hat for cell cycle tricks. *Curr. Opin.*  
775 *Cell Biol.* **12**, 372–377 (2000).
- 776 69. Leung, A. K. L. *et al.* Quantitative kinetic analysis of nucleolar breakdown and reassembly  
777 during mitosis in live human cells. *J. Cell Biol.* **166**, 787–800 (2004).
- 778 70. Petkova, A. T. *et al.* Self-propagating, molecular-level polymorphism in Alzheimer's  $\beta$ -  
779 amyloid fibrils. *Science (80-. )*. (2005). doi:10.1126/science.1105850
- 780 71. Meinen, B. A., Gadkari, V. V., Stull, F., Ruotolo, B. T. & Bardwell, J. C. A. SERF engages in  
781 a fuzzy complex that accelerates primary nucleation of amyloid proteins. *Proc. Natl. Acad. Sci.*  
782 (2019). doi:10.1073/pnas.1913316116
- 783 72. Pras, A. *et al.* The cellular modifier MOAG-4/SERF drives amyloid formation through charge  
784 complementation. *bioRxiv* 2020.12.09.417709 (2020). doi:10.1101/2020.12.09.417709
- 785 73. Grant, M. A. *et al.* *Familial Alzheimer's disease mutations alter the stability of the amyloid-*  
786 *protein monomer folding nucleus.* **104**, (2007).
- 787 74. Lazo, N. D., Grant, M. A., Condrón, M. C., Rigby, A. C. & Teplow, D. B. On the nucleation of  
788 amyloid  $\beta$ -protein monomer folding. *Protein Sci.* **14**, 1581–1596 (2009).
- 789 75. Elkins, M. R. *et al.* Structural Polymorphism of Alzheimer's  $\beta$ -Amyloid Fibrils as Controlled  
790 by an E22 Switch: A Solid-State NMR Study. (2016). doi:10.1021/jacs.6b03715
- 791 76. Ovchinnikova, O. Y., Finder, V. H., Vodopivec, I., Nitsch, R. M. & Glockshuber, R. The  
792 Osaka FAD Mutation E22 $\Delta$  Leads to the Formation of a Previously Unknown Type of  
793 Amyloid  $\beta$  Fibrils and Modulates A $\beta$  Neurotoxicity. *J. Mol. Biol.* **408**, 780–791 (2011).

- 794 77. Van Nostrand, W. E., Melchor, J. P., Cho, H. S., Greenberg, S. M. & Rebeck, G. W.  
795 Pathogenic effects of D23N Iowa mutant amyloid beta -protein. *J. Biol. Chem.* **276**, 32860–6  
796 (2001).
- 797 78. Inayathullah, M. & Teplow, D. B. Structural dynamics of the  $\Delta\epsilon 22$  (Osaka) familial  
798 Alzheimer's disease-linked amyloid  $\beta$ -protein. *Amyloid* **18**, 98–107 (2011).
- 799 79. Bugiani, O. *et al.* Hereditary Cerebral Hemorrhage With Amyloidosis Associated With the  
800 E693K Mutation of APP. *Arch. Neurol.* **67**, 987–995 (2010).
- 801 80. Grabowski, T. J., Cho, H. S., Vonsattel, J. P. G., Rebeck, G. W. & Greenberg, S. M. Novel  
802 amyloid precursor protein mutation in an Iowa family with dementia and severe cerebral  
803 amyloid angiopathy. *Ann. Neurol.* **49**, 697–705 (2001).
- 804 81. Philipson, O. *et al.* A highly insoluble state of A $\beta$  similar to that of Alzheimer's disease brain is  
805 found in Arctic APP transgenic mice. *Neurobiol. Aging* **30**, 1393–1405 (2009).
- 806 82. Shimada, H. *et al.* Clinical course of patients with familial early-onset Alzheimer's disease  
807 potentially lacking senile plaques bearing the E693 $\Delta$  mutation in amyloid precursor protein.  
808 *Dement. Geriatr. Cogn. Disord.* **32**, 45–54 (2011).
- 809 83. Tomiyama, T. *et al.* A Mouse Model of Amyloid  $\beta$  Oligomers: Their Contribution to Synaptic  
810 Alteration, Abnormal Tau Phosphorylation, Glial Activation, and Neuronal Loss In Vivo. *J.*  
811 *Neurosci.* **30**, 4845–4856 (2010).
- 812 84. Lord, A. *et al.* The Arctic Alzheimer mutation facilitates early intraneuronal A $\beta$  aggregation  
813 and senile plaque formation in transgenic mice. *Neurobiol. Aging* **27**, 67–77 (2006).
- 814 85. Kulic, L. *et al.* Early accumulation of intracellular fibrillar oligomers and late congophilic  
815 amyloid angiopathy in mice expressing the Osaka intra-A $\beta$  APP mutation. *Transl. Psychiatry*  
816 **2**, e183–e183 (2012).

- 817 86. Philipson, O. *et al.* The Arctic amyloid- $\beta$  precursor protein (A $\beta$ PP) mutation results in distinct  
818 plaques and accumulation of N- and C-truncated A $\beta$ . *Neurobiol. Aging* **33**, 1010.e1-1010.e13  
819 (2012).
- 820 87. Skarnes, W. C. *et al.* A conditional knockout resource for the genome-wide study of mouse  
821 gene function. *Nature* **474**, 337–342 (2011).
- 822 88. Huang, D. W., Sherman, B. T. & Lempicki, R. A. Systematic and integrative analysis of large  
823 gene lists using DAVID bioinformatics resources. *Nat. Protoc.* **4**, 44–57 (2009).
- 824 89. Huang, D. W., Sherman, B. T. & Lempicki, R. A. Bioinformatics enrichment tools: paths  
825 toward the comprehensive functional analysis of large gene lists. *Nucleic Acids Res.* **37**, 1–13  
826 (2009).
- 827 90. Huang, Y. *et al.* Loss of GPR3 reduces the amyloid plaque burden and improves memory in  
828 Alzheimer’s disease mouse models. *Sci. Transl. Med.* **7**, 309ra164 (2015).
- 829 91. Schindelin, J. *et al.* Fiji: an open-source platform for biological-image analysis. *Nat. Methods*  
830 **9**, 676–682 (2012).
- 831

832 **Figure legends**

833 **Figure 1. Full-body *Serf2*<sup>-/-</sup> mice display a developmental delay and perinatal lethality. (A)**

834 Schematic overview of the crossing scheme with full-body *Serf2*<sup>+/-</sup> mice and the resulting genotypic  
835 composition of the offspring at embryonic and postnatal stage. **(B)** Absolute animal counts for the  
836 three genotypes in the offspring at various days of embryonic development (E13.5, E15.5 and E17.5),  
837 at birth (P0) and at time of weaning (P22). **(C)** Real time RT-PCR analyses of *Serf1* and *Serf2* RNA  
838 levels in E13.5 heads normalized to housekeeping gene beta-actin (n=4/group, mean±SD, One-way  
839 ANOVA for each gene, Bonferroni corrected post-hoc comparison between genotypes \*\*\*p<0.001).  
840 **(D)** Western blot of SERF2 and actin in *Serf2*<sup>+/+</sup>, *Serf2*<sup>+/-</sup>, *Serf2*<sup>-/-</sup> embryos at E13.5 (black arrow  
841 indicates SERF2 band). **(E)** Length measurements of *Serf2*<sup>+/+</sup>, *Serf2*<sup>+/-</sup>, *Serf2*<sup>-/-</sup> embryos at E15.5, E17.5  
842 and P0 (black line = mean, Two-way ANOVA with factors age and genotype, Bonferroni corrected  
843 post-hoc comparison for *Serf2*<sup>+/-</sup> and *Serf2*<sup>-/-</sup> compared to *Serf2*<sup>-/-</sup> \*p<0.05; \*\*\*p<0.001). **(F)**  
844 Hematoxylin and eosin stained lung tissue from *Serf2*<sup>+/+</sup> and *Serf2*<sup>-/-</sup> pups at P0 (top: *Serf2*<sup>-/-</sup>, bottom:  
845 *Serf2*<sup>+/+</sup>, scale bar=500µm, rectangle =5x magnification in right picture, **(G)** Quantification of the  
846 saccolar space in lung tissue from *Serf2*<sup>+/+</sup> and *Serf2*<sup>-/-</sup> pups at P0 (black line = mean, t-test \*\*p<0.01).  
847 For all mouse data panels: *Serf2*<sup>+/+</sup> = black, *Serf2*<sup>+/-</sup> = dark grey, *Serf2*<sup>-/-</sup> = light grey.

848 **Figure 2. Crossing a conditional *Serf2* KO with an AM background does not affect the overall**

849 **levels of APP and Aβ. (A)** Schematic overview of the cross between brain-specific *Serf2* KO mice

850 and the amyloid model resulting in four experimental groups: WT, *Serf2*<sup>br-/-</sup>, AM and AM;*Serf2*<sup>br-/-</sup>.

851 **(B)** Timeline for the Aβ pathology in the amyloid model and the selected time points for this study.

852 **(C)** Real time RT-PCR analyses of *Serf2* RNA levels in the brain tissue of all experimental groups at 1

853 and 3 months of age normalized to housekeeping gene beta-actin (n=6/group, mean±SD, Two-way

854 ANOVA with factors age and genotype, Bonferroni corrected post-hoc for individual groups

855 compared to WT). **(D)** Western blot of SERF2 and actin in brain tissue of all experimental groups at 1

856 and 3 months of age. **(E)** Brain weight of all experimental groups at 1 and 3 months of age (black line

857 = mean, Two-way ANOVA with factors age and genotype, Bonferroni corrected post-hoc for

858 individual groups compared to WT). **(F)** Brain weight of unfloxed control groups at 3 months of age  
859 (black line = mean, One-way ANOVA, Bonferroni corrected post-hoc for individual groups compared  
860 to WT). **(G)** Number of cortical nuclei per mm<sup>2</sup> in hematoxylin and eosin stained brain tissue of all  
861 experimental groups at 3 months of age. (n=3/group, mean±SD, Kruskal-Wallis p=0.5566). **(H)** Real  
862 time RT-PCR analyses of APP RNA levels in the brain tissue of AM and AM;*Serf2*<sup>br/-</sup> mice at 1 and 3  
863 months of age normalized to housekeeping gene beta-actin (n=6/group, mean±SD, t-test between  
864 genotypes at both ages not significant). **(I)** Western blot of APP and beta-actin in brain tissue of AM  
865 and AM;*Serf2*<sup>br/-</sup> mice at 3 months of age versus 1-month-old non-AM controls. **(J)** Quantification of  
866 total APP protein levels in brains of AM and AM;*Serf2*<sup>br/-</sup> mice at 1 and 3 months of age normalized  
867 to beta-actin levels. (black line = mean, t-test between genotypes at both ages not significant). **(K)**  
868 Aβ<sub>40</sub> and **(L)** Aβ<sub>42</sub> levels in brain lysate from AM and AM;*Serf2*<sup>br/-</sup> mice at 1 and 3 months of age as  
869 determined by ELISA normalized to total protein content. (black line = mean, t-test between  
870 genotypes at both ages not significant). **(M)** Correlation plot depicting the relationship between Aβ<sub>40</sub>  
871 and Aβ<sub>42</sub> levels in AM (black) and AM;*Serf2*<sup>br/-</sup> (grey) mice at 3 months of age (detailed statistics in  
872 Supplemental Table 3). In panels A-L: WT = black, *Serf2*<sup>br/-</sup> = light grey, AM = dark grey and  
873 AM;*Serf2*<sup>br/-</sup> = white; \*\*\*p<0.001; \*\*p<0.01.

874 **Figure 3. Brain-specific *Serf2* KO display increased Aβ deposition and amyloid.** **(A)** Detailed light  
875 microscope images of the 6E10-stained cortical region marked on the sagittal section in Supplemental  
876 Figure 5 from 3-month-old AM and AM;*Serf2*<sup>br/-</sup> mice (scale bar = 100μm). **(B)** Quantification of the  
877 Aβ deposits in the region of interest (ROI) of 6E10 immunostained sagittal brain sections from 1- and  
878 3-month-old AM and AM;*Serf2*<sup>br/-</sup> mice (black line = mean, One-way ANOVA between genotypes at  
879 both ages, Bonferroni corrected post-hoc between AM and AM;*Serf2*<sup>br/-</sup> not significant). **(C)**  
880 Correlation plot depicting the relationship between Aβ<sub>40</sub> levels and 6E10 plaque density in AM (black)  
881 and AM;*Serf2*<sup>br/-</sup> (grey) mice at 3 months of age. **(D)** Correlation plot depicting the relationship  
882 between Aβ<sub>42</sub> levels and 6E10 plaque density in AM (black) and AM;*Serf2*<sup>br/-</sup> (grey) mice at 3 months  
883 of age. **(E)** Quantification of the Aβ deposits in the ROI of W0-2 immunostained sagittal brain  
884 sections from 1- and 3-month-old AM and AM;*Serf2*<sup>br/-</sup> mice (black line = mean, One-way ANOVA

885 between genotypes at both ages, Bonferroni corrected post-hoc between AM and AM;*Serf2*<sup>br/-</sup> not  
886 significant). **(F)** Correlation plot depicting the relationship between 6E10 deposits and W0-2 deposits  
887 in AM (black) and AM;*Serf2*<sup>br/-</sup> (grey) mice at 3 months of age. **(G)** Quantification of the plaque  
888 density in the ROI of Thioflavin-S stained sagittal brain sections from 1- and 3-month-old AM and  
889 AM;*Serf2*<sup>br/-</sup> mice (black line = mean, One-way ANOVA between genotypes at both ages, Bonferroni  
890 corrected post-hoc between AM and AM;*Serf2*<sup>br/-</sup> not significant). **(H)** Correlation plot depicting the  
891 relationship between A $\beta$ <sub>40</sub> levels and ThS plaque density in AM (black) and AM;*Serf2*<sup>br/-</sup> (grey) mice  
892 at 3 months of age. **(I)** Correlation plot depicting the relationship between A $\beta$ <sub>42</sub> levels and ThS plaque  
893 density in AM (black) and AM;*Serf2*<sup>br/-</sup> (grey) mice at 3 months of age. **(J)** Correlation plot depicting  
894 the relationship between 6E10 deposits and ThS plaques in AM (black) and AM;*Serf2*<sup>br/-</sup> (grey) mice  
895 at 3 months of age. In all panels ROI = cortical and hippocampal area; In panels B,E and G: WT =  
896 black, *Serf2*<sup>br/-</sup> = light grey, AM = dark grey and AM;*Serf2*<sup>br/-</sup> = white; for correlation plots: detailed  
897 statistics in Supplemental Table 3; \*\*\*p<0.001; \*\*p<0.01; \*p<0.05.

898 **Figure 4. Brain-specific *Serf2* KO alters the structural composition of amyloid plaques. (A)**

899 Graph showing the theoretical LCO dye emission spectra for qFTAA, which binds mature A $\beta$  fibrils  
900 (blue), and hFTAA, which binds both mature fibrils and prefibrillar A $\beta$  species (red). **(B)** Frequency  
901 distribution of the ratio in fluorescence intensity at 502 nm and 588 nm for all amyloid plaques  
902 identified by confocal microscopy in AM (blue) and AM;*Serf2*<sup>br/-</sup> (red) mice at 3 months of age. Three  
903 peak frequency categories were identified: low IR(red), medium IR (green) and high IR (blue) (n=6  
904 mice/genotype). **(C)** Dot plot representing the intensity ratio of all amyloid plaques identified by  
905 confocal microscopy for AM and AM;*Serf2*<sup>br/-</sup> mice at 3 months of age (colors represent the IR  
906 categories defined in panel B, black circles correspond to the plaques depicted in panel E, black line =  
907 mean, t-test \*\*\*p<0.001) (n=6 mice/genotype). **(D)** Correlation plot depicting the relationship between  
908 6E10 plaque density in the ROI and the LCO average intensity ratio in AM (black) and AM;*Serf2*<sup>br/-</sup>  
909 (grey) mice at 3 months of age (ROI = cortical and hippocampal area, detailed statistics in  
910 Supplemental Table 3). **(E)** Spectral confocal microscopy images of amyloid plaques in AM and  
911 AM;*Serf2*<sup>br/-</sup> mice at 3 months of age of double stained with qFTAA and hFTAA (top= fluorescence

912 at 502 nm, middle= fluorescence at 588 nm, bottom=merged image of 502 nm and 588 nm  
913 fluorescence, scale bar = 5  $\mu$ m). **(F)** Scanning transmission electron microscopy pictures of amyloid  
914 plaques in the cortex of AM and AM;*Serf2*<sup>br/-</sup> mice at 3 months of age (top scale bar 5 $\mu$ m, rectangle =  
915 zoomed region in bottom picture, bottom scale bar = 1 $\mu$ m). High-resolution EM images are available  
916 via <http://www.nanotomy.org>.



**Figure 1**

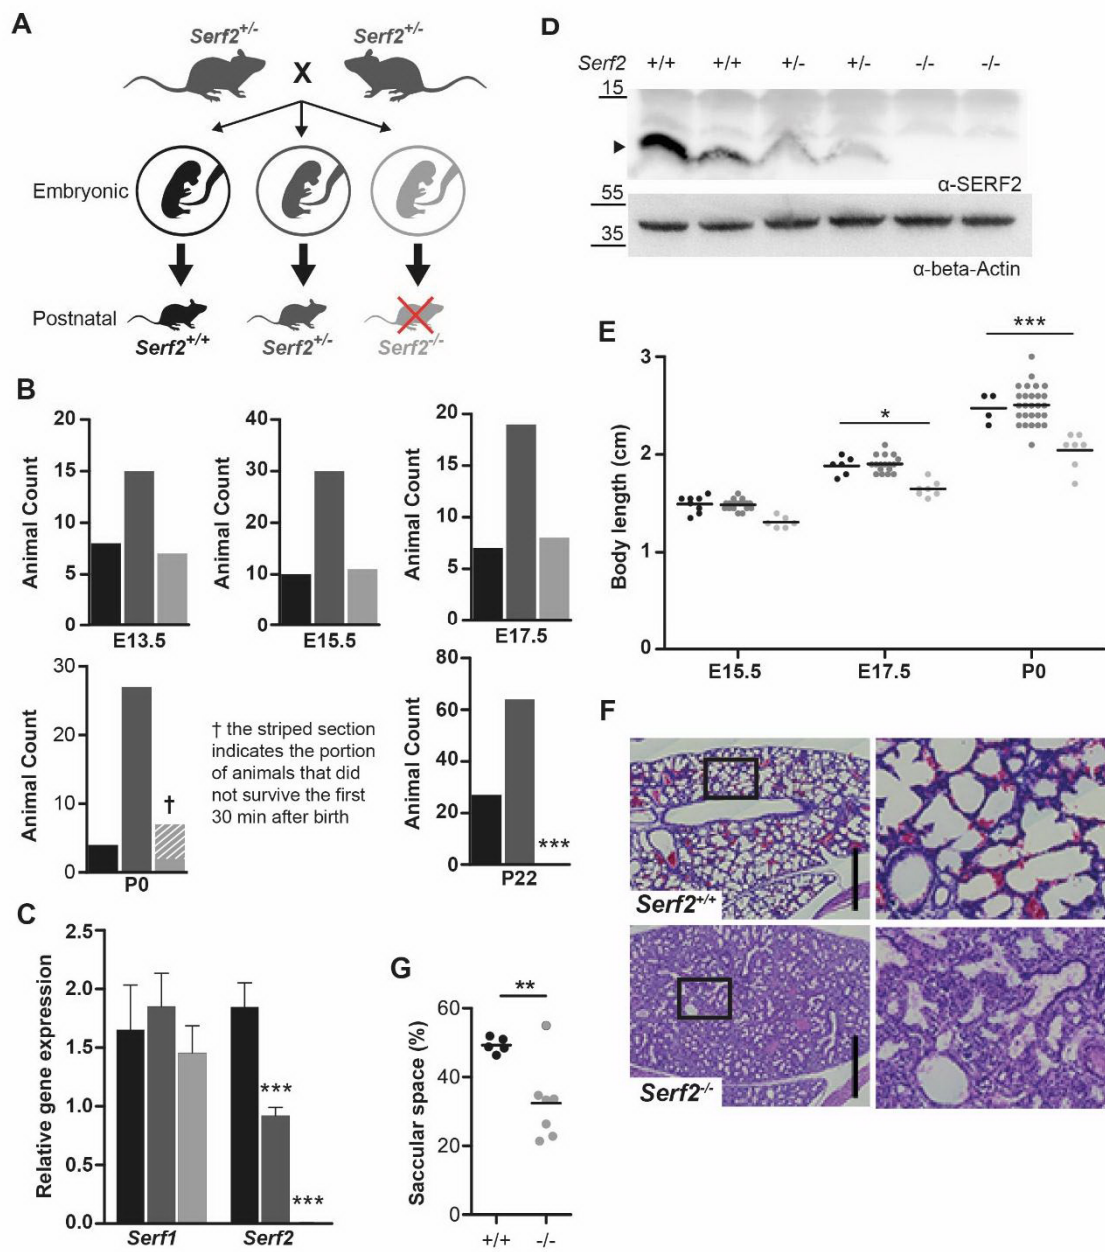

**Figure 2**

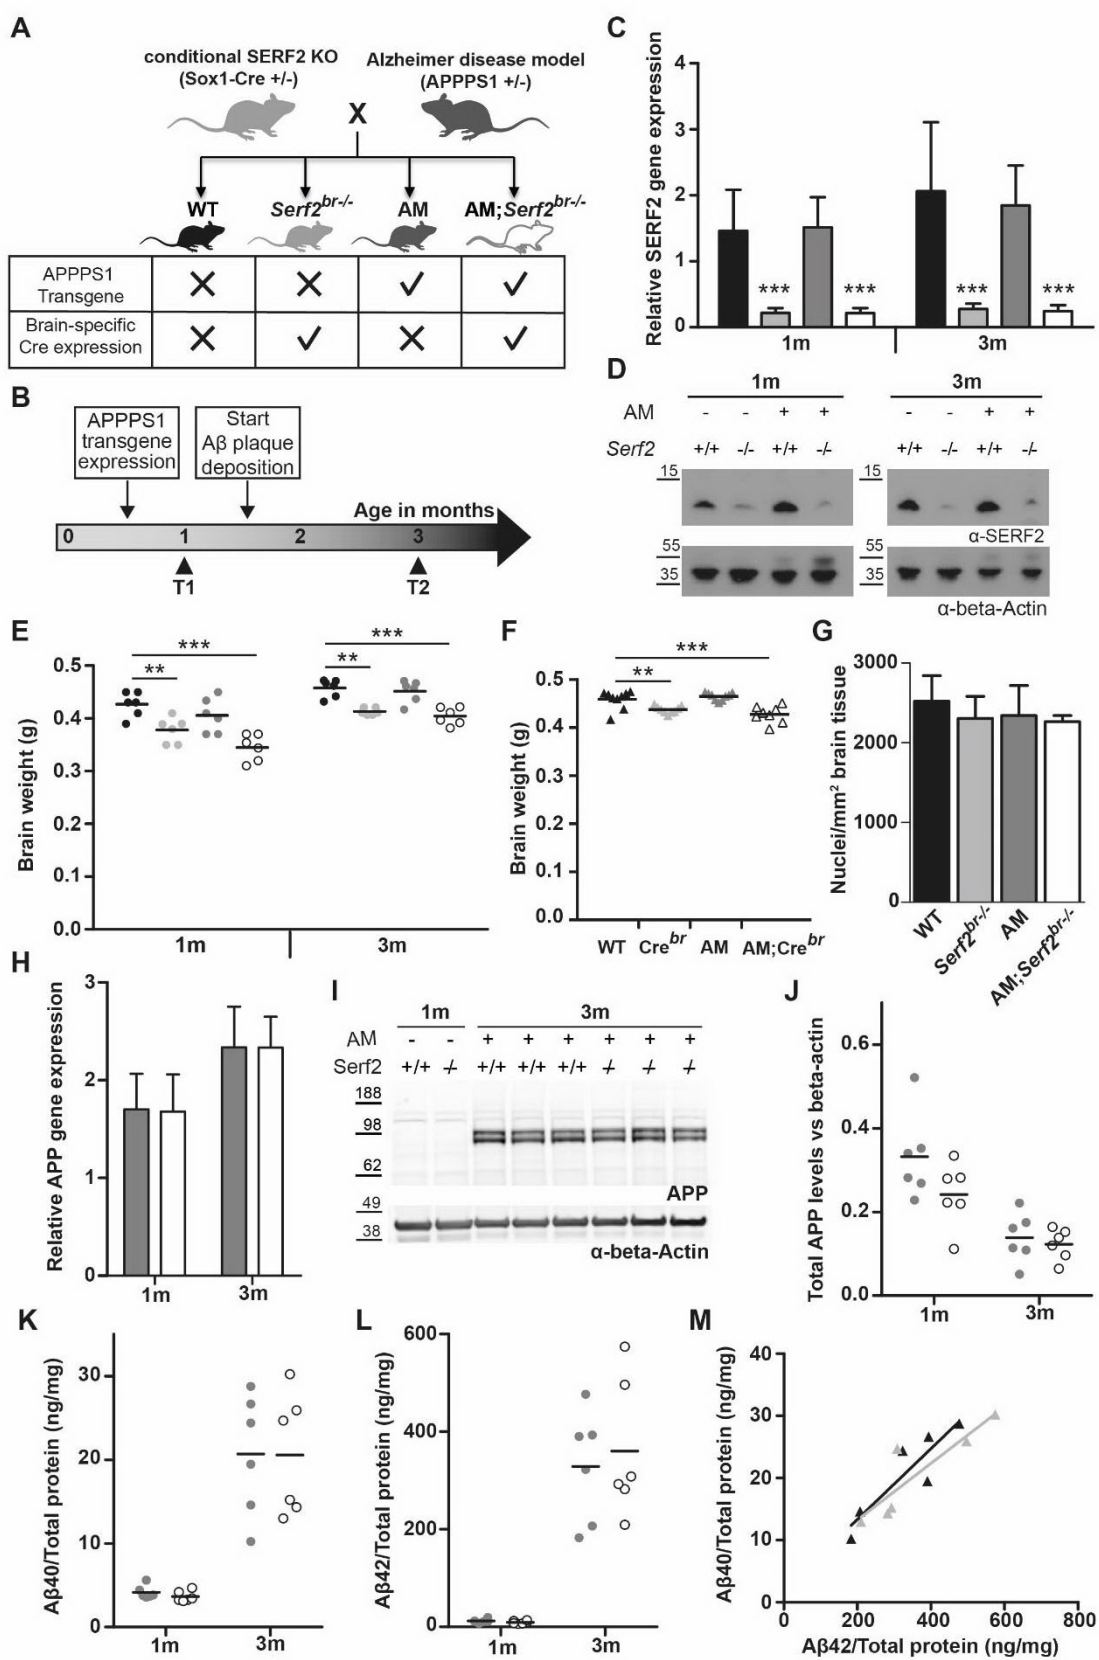

Figure 3

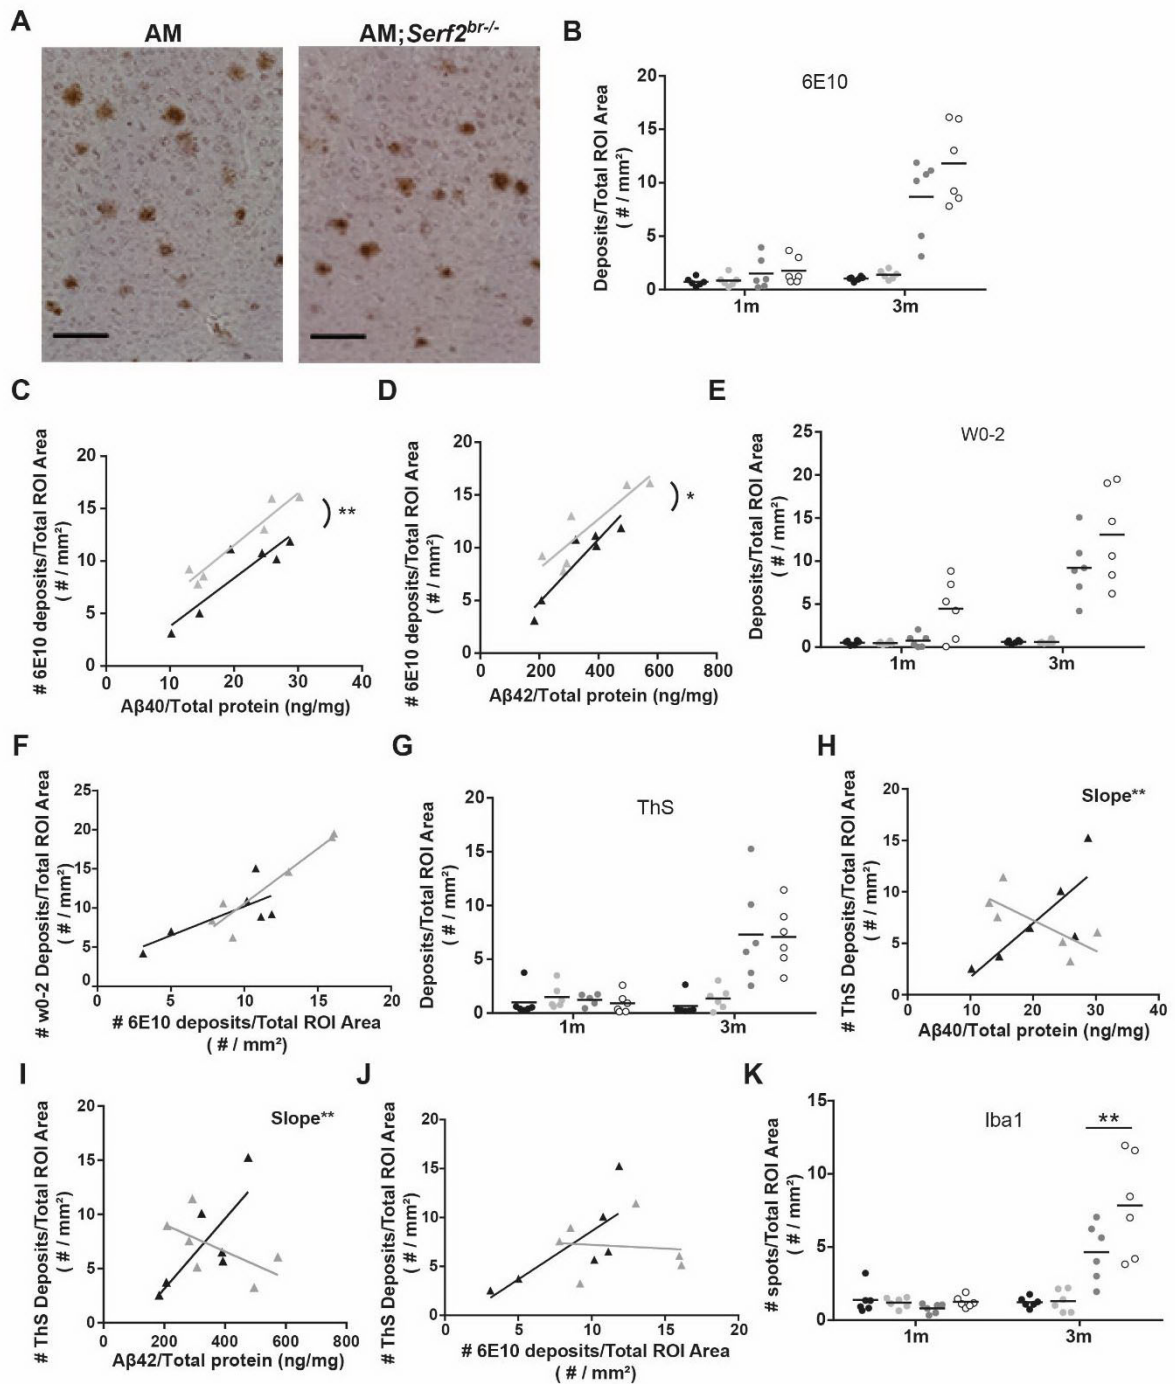

**Figure 4**

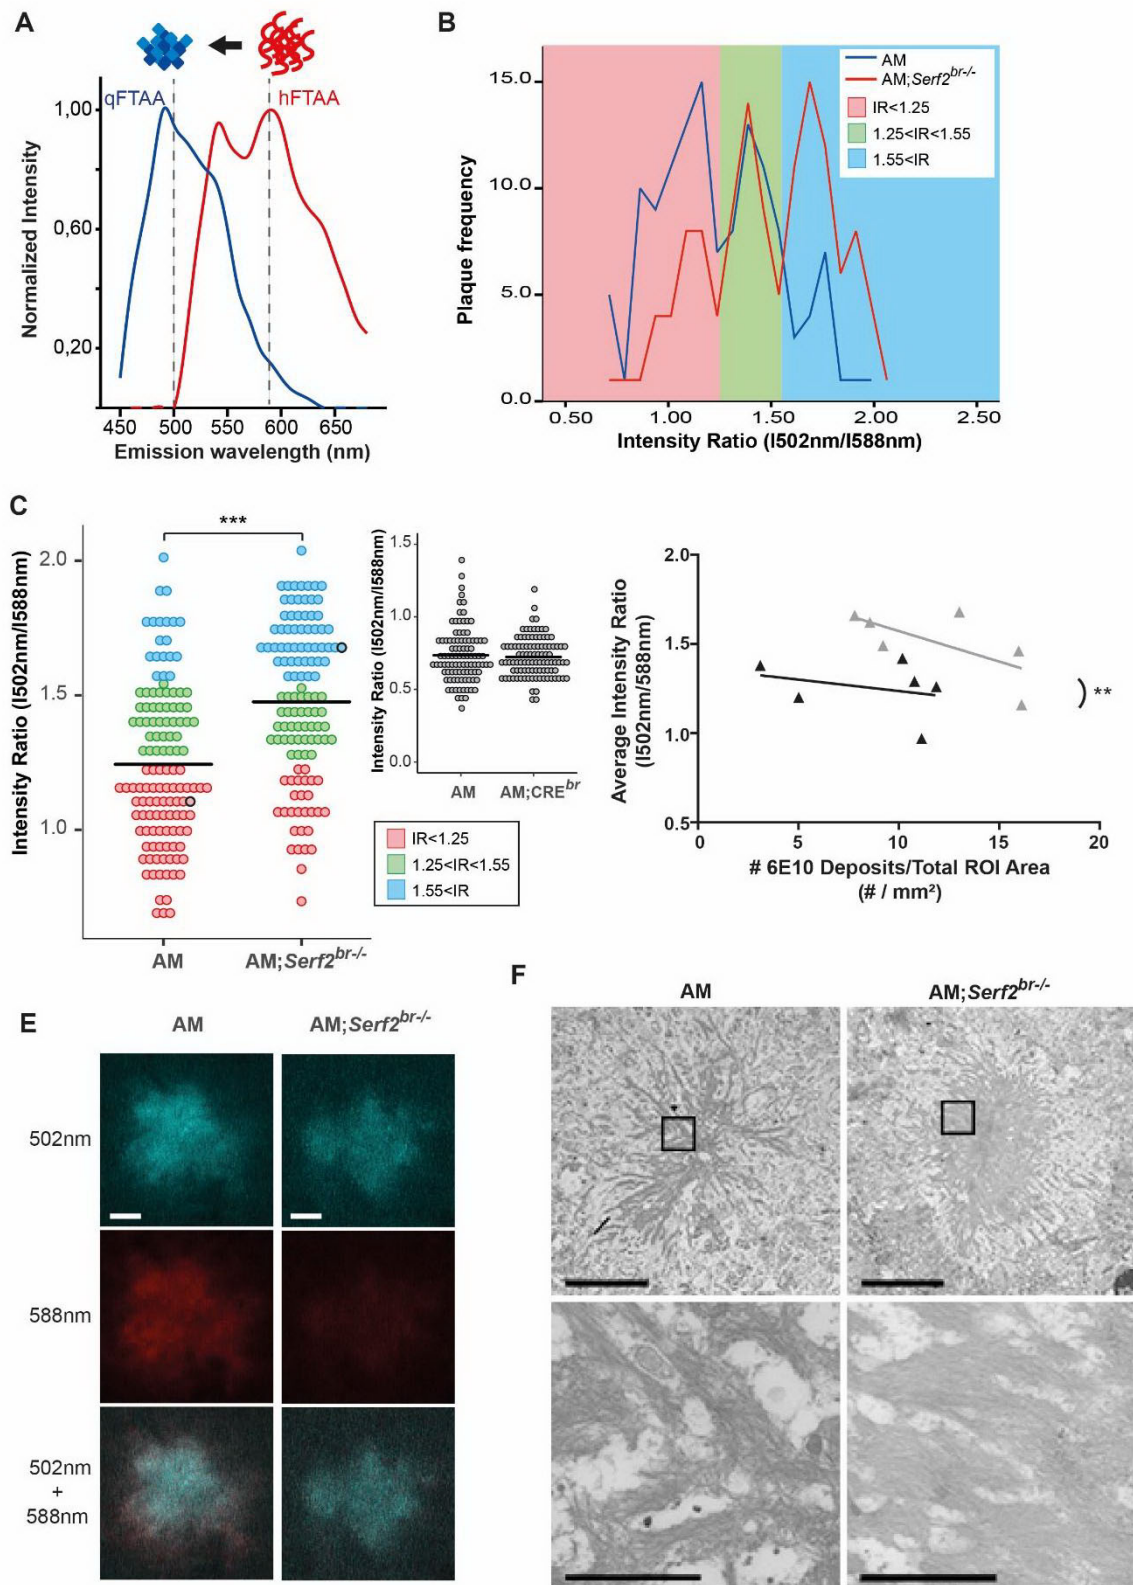

## 917 Supplemental figure legends

918 **Supplemental Figure 1. Additional full-body *Serf2*<sup>-/-</sup> mice validation and phenotype**  
919 **confirmation. (A)** Targeting strategy used to delete exon 2 of *Serf2* by using the ‘knockout-first’-  
920 allele (adjusted from Skarnes et al. 2011). Top panel: exon/intron structure of *Serf2* including the  
921 positions of the LacZ and Neo cassettes, as well as loxP sites. Bottom panel: the *Serf2* allele after  
922 recombination events as a result of crosses with *Hprt-Cre* mice. **(B)** Western blot analysis of liver,  
923 heart and brain tissue of a *Serf2*<sup>+/+</sup>, *Serf2*<sup>+/-</sup> and *Serf2*<sup>-/-</sup> adult mice to detect Serf2 and actin. **(C)** Real  
924 time RT-PCR analyses of *Serf2* in different organs of adult mice with the following genotypes *Serf2*<sup>+/+</sup>  
925 (n=3), *Serf2*<sup>+/-</sup> (n=8) and *Serf2*<sup>-/-</sup> (n=1). *Serf2* levels were normalized to the housekeeping gene 18S  
926 (mean ± SEM). **(D)** Lateral view of a *Serf2*<sup>-/-</sup> and *Serf2*<sup>+/-</sup> embryo and placenta at embryonic day 15.5  
927 and 17.5. **(E)** Weight measurements of *Serf2*<sup>+/+</sup>, *Serf2*<sup>+/-</sup>, *Serf2*<sup>-/-</sup> embryos at E17.5 and P0 (black line =  
928 mean, Two-way ANOVA with factors age and genotype, Bonferroni corrected post-hoc comparison  
929 for *Serf2*<sup>+/-</sup> and *Serf2*<sup>-/-</sup> compared to *Serf2*<sup>-/-</sup> \*p<0.05; \*\*\*p<0.001). **(F)** Hematoxylin and Eosin staining  
930 on *Serf2*<sup>-/-</sup> and *Serf2*<sup>+/+</sup> lung and kidney tissue at E17.5 (10 times magnification). For all panels:  
931 *Serf2*<sup>+/+</sup> = black, *Serf2*<sup>+/-</sup> = dark grey, *Serf2*<sup>-/-</sup> = light grey.

932 **Supplemental Figure 2. Cell culture data of *Serf2* KO and control HEK cells and RNA**  
933 **sequencing analysis of mouse embryonic fibroblasts (MEFs) isolated from full-body *Serf2*<sup>-/-</sup> and**  
934 **control mice. (A)** Growth curve of two CRISPR-induced *Serf2*<sup>-/-</sup> clones of HEK293T versus wild-type  
935 HEK293T. (Three replicates measured, full line=replicate average, dashed lines=standard deviation on  
936 average) **(B)** Network showing the interconnectivity of enriched GO-terms in RNA sequencing data  
937 from *Serf2*<sup>-/-</sup> and control MEFs. Circle size indicates amount of differentially expressed genes found in  
938 each GO-category. Edges were drawn when the minor category shared more than 25 % of its found  
939 genes with the major category. Edge color indicates the major category in the relationship. Edge  
940 thickness indicates the percentage of found genes shared by the minor category. **(C)** Bar chart  
941 indicating the fold change for each GO-term as determined by DAVID. Brackets indicate the three  
942 main GO-term clusters defined based on the network in (B).

943 **Supplemental Figure 3. Additional validation of the brain-specific knock-out of *Serf2*. (A)**  
944 Modified targeting strategy used to delete the exon 2 of *Serf2* specifically in the central nervous  
945 system. **(B)** Real time RT-PCR analyses of *Serf2* RNA expression in different organs *Serf2*<sup>+/+</sup> and  
946 *Serf2*<sup>br/-</sup> female mice at 1 month and 3 months of age. *Serf2* expression was normalized to  
947 housekeeping gene beta-actin (all groups n=6, mean ± SEM). **(C)** Western blot analysis and  
948 quantification of *Serf2* and beta-actin in brain lysates of WT and *Serf2*<sup>br/-</sup> female mice at 1 month  
949 (both groups n=6, mean ± SEM, t-test \*\*p<0.01). **(D)** Brain weight of unfloxed WT and CRE<sup>br</sup> mice at  
950 1 and 3 months of age (black line = mean, Two-way ANOVA with factors age and genotype,  
951 Bonferroni corrected post-hoc for CRE<sup>br</sup> compared to WT \*p<sub>bon</sub><0.05). **(E)** Evolution of brain weight  
952 in WT and *Serf2*<sup>br/-</sup> female mice between 1 and 11 months of age (black line = mean).

953 **Supplemental Figure 4. Overview of distribution and general morphological parameters of**  
954 **6E10-stained A $\beta$  deposits in AM and AM;*Serf2*<sup>br/-</sup> mice at 3 months of age. (A)** Light microscope  
955 images of the 6E10 immunostained sagittal section of 3-month-old AM and AM;*Serf2*<sup>br/-</sup> female mice  
956 (scale bar = 1mm, black rectangle = magnified region in main Figure 3). **(B)** Boxplots showing the  
957 distribution of the surface area of the individual plaques measured in AM and AM;*Serf2*<sup>br/-</sup> mice at 3  
958 months of age. **(C)** Boxplots showing the distribution of the circularity of the individual plaques  
959 measured in AM and AM;*Serf2*<sup>br/-</sup> mice at 3 months of age. **(D)** Boxplots showing the distribution of  
960 the solidity of the individual plaques measured in AM and AM;*Serf2*<sup>br/-</sup> mice at 3 months of age. For  
961 all boxplots: black line = median, box = 25<sup>th</sup>-75<sup>th</sup> percentile, whiskers = 1.5 x interquartile range  
962 (IQR), circles = outlier value > 1.5x IQR, asterisks = extreme outlier value > 3x IQR.

963 **Supplemental Figure 5. Overview of distribution and detailed W0-2-stained A $\beta$  deposits in AM**  
964 **and AM;*Serf2*<sup>br/-</sup> mice at 3 months of age.** Light microscope images of the W0-2 immunostained  
965 sagittal section of 3-month-old AM and AM;*Serf2*<sup>br/-</sup> female mice (scale bar = 1mm, black rectangle =  
966 magnified in insert on the right, insert scale bar = 100 $\mu$ m).

967 **Supplemental Figure 6. Correlation plots illustrating the relationship of different stains in**  
968 **individual mice. (A)** Correlation plot depicting the relationship between the density of 6E10 deposits

969 and Iba1-positive spots in AM (black) and AM;*Serf2*<sup>br/-</sup> (grey) mice at 3 months of age. **(B)**  
970 Correlation plot depicting the relationship between W0-2 plaque density and the LCO average  
971 intensity ratio in AM (black) and AM;*Serf2*<sup>br/-</sup> (grey) mice at 3 months of age. **(C)** Correlation plot  
972 depicting the relationship between ThS plaque density and the LCO average intensity ratio in AM  
973 (black) and AM;*Serf2*<sup>br/-</sup> (grey) mice at 3 months of age. For all plots: detailed statistics in  
974 Supplemental Table 3; \*p < 0.05.

975 **Supplemental Figure 7. Overview and detailed view of A $\beta$  staining pattern after W0-2 and 6E10**  
976 **staining in AM and AM;*Serf2*<sup>br/-</sup> mice at 1 month of age. **(A)** Light microscope images of the W0-2**  
977 immunostained sagittal section of 1-month-old AM and AM;*Serf2*<sup>br/-</sup> female mice. **(B)** Light  
978 microscope images of the 6E10 immunostained sagittal section of 1-month-old AM and AM;*Serf2*<sup>br/-</sup>  
979 female mice. All pictures: main scale bar = 1mm, black rectangle = magnified in insert on the right,  
980 insert scale bar = 100 $\mu$ m.
